# Supplementary material for: Relative flux measurements of biogenic and natural gas-derived methane for seven U.S. cities
Source: Oxford University Press journal article supplement (doi:10.1525/elementa.2021.000119), 2021-01-01
Supplement: revised_supplemental_materials_20210105.docx [file revised_supplemental_materials_20210105.docx]

**Supplemental Material**

**Measurement of the Fraction of Methane Emissions Derived from Natural Gas for Seven U. S. Cities: Supplemental Material**

Cody Floerchinger1, Paul B. Shepson2,3, Kristian Hajny2, Brian H. Stirm4, Bruce Daube1, Colm Sweeney5, and Steven C. Wofsy1

1Department of Earth and Planetary Sciences, Harvard University, Cambridge, MA, United States

2Department of Chemistry, Purdue University, West Lafayette, IN, United States

3School of Marine and Atmospheric Sciences, Stony Brook University, Stony Brook, NY, United States

4Purdue University, School of Aviation & Transportation Technology, Polytechnic Institute, West Lafayette, IN, United States

5Global Monitoring Division, Earth System Research Laboratory, National Oceanic and Atmospheric Administration, Boulder, CO, United States

Corresponding Author:

Cody Floerchinger [codyfloerchinger@g.harvard.edu](mailto::codyfloerchinger@g.harvard.edu), Steven C. Wofsy [swofsy@seas.harvard.edu](mailto:swofsy@seas.harvard.edu)

December 09, 2020

**List of Contents:**

**Section 1: Gas Phase Instrument Performance and Calibration:**

- **Figure S1.** An Allan variance plot showing the performance of the ethane spectrometer during a flight at the end of the summer campaign. (Page 4)
- **Figure S2.** Historical calibration factors spanning the life of the Picarro instrument Section 3: Error Analysis in the Computation of the Model Derived Inflow (MDI). (Page 6)

**Section 2: Natural Gas EMERs and Tabulated Results:**

- **Supplemental Table 1.** Operating parameters and results from the experiment described in the manuscript. (Page 7)
- **Figure S3.** A tracer-tracer plot of the computed enhancements of C2H6 and CH4 for the summer and winter flight over New York, NY. (Page 8)
- ***Supplemental Table 2.***Error terms selected from the literature and input into the STILT model to account for possible error in the meteorology driving the simulation of the MDI. (Page 9)
- **Figure S4.** An example of meteorological model error parameters when determining the MDI. (Page 11)
- **Figure S5.** MDI Calculated during a flight over Washington D.C. / Baltimore, MD. (Page 12)

**Section 4: Model-Data Comparison of NAMS-12km Meteorology to the Aircraft:**

- **Figure S6.** Time series from the model data comparison of NAMS-12km meteorology and BAT prob measurements. (Page 13)
- **Figure S7.** Analysis from three days of BAT Probe meteorological data used to assess the uncertainty in the NAMS12 meteorology fields. (Page 14)

**Section 5: Footprint Analysis and Flux Sensitivity Maps for Each Domain:**

- **Supplemental Table 3.** Domain used for the STILT runs to compute the MDI and the ground flux sensitivity.(Page 15)
- **Figure S8.** Flux Sensitivity Map for a summer flight over Boston, MA: 2017/08/27. (Page 16)
- **Figure S9.** Flux Sensitivity Map for a winter flight over Boston, MA: 2018/04/09. (Page 17)
- **Figure S10.** Flux Sensitivity Map for a summer flight over Chicago, IL: 2017/06/06. (Page 18)
- **Figure S11.** Flux Sensitivity Map for a winter flight over Chicago, IL: 2018/03/15. (Page 19)
- **Figure S12.** Flux Sensitivity Map for a winter flight over Indianapolis, IN: 2018/03/18. (Page 20)
- **Figure S13.** Flux Sensitivity Map for a summer flight over New York, NY: 2017/09/02 (Page 21)
- **Figure S14.** Flux Sensitivity Map for a winter flight over New York, NY: 2018/03/20. (Page 22)
- **Figure S15.** Flux Sensitivity Map for a summer flight over Philadelphia, PA: 2017/08/28. (Page 23)
- **Figure S16.** Flux Sensitivity Map for a winter flight over Philadelphia, PA: 2018/04/26. (Page 24)
- **Figure S17.** Flux Sensitivity Map for a summer flight over Washington, D.C. & Baltimore, MD: 2017/08/27. (Page 25)
- **Figure S18.** Flux Sensitivity Map for a winter flight over Washington, D.C. & Baltimore, MD: 2018/03/29. (Page 26)
- **Figure S19.** Flux Sensitivity Map for a winter flight over Richmond, VA: 2018/03/28. (Page 27)

**Section 6: Flights in Indianapolis, IN with multiple transects:**

- **Figure S20.** Flux Sensitivity Map for a summer flight over Indianapolis, IN: 2017/06/19 (Transect 2). (Page 29)
- **Figure S21.**  Flux Sensitivity Map for a summer flight over Indianapolis, IN: 2017/06/19 (Transect 1). (Page 30)
- **Figure S22.** Distributions of the TMER measured in Indianapolis on 2018-03-16. (Page 31)

**Section 6: Gridded EPA Inventory Analysis**

- **Supplemental Table 4.** Chart showing that few GEPA sectors are relevant for the CH4 emissions from each urban domain. (Page 32)
- **Figure S23.** A graphical representation of the fractional emissions from each sector suggested by the GEPA inventory for the various urban areas sampled in this study. (Page 33)

**Section 7: GEPA Comparison to EDGAR**

- **Figure S24.** Inventory comparisons of the suggested fraction of total CH4 emissions that can be attributed to natural gas sources for both the EDGAR 4.3.2 inventory and the GEPA inventory. (Page 34)

**Section 8: Discussion of TMERs Reported with Added Uncertainty**

- **Figure S25.** Time series of the third transect during the 2018-03-20 NYC flight. (Page 35)

**Section 9: Mixing ratio comparison to reported EMER:**

- **Figure S26a & S26b.** Mixing ratio data from each flight with an intercept adjusted pipeline ratio to show the agreement of aircraft observed CH4:C2H6 with the published EMER.(Page 37 & 38)

**Section 10: TMER Calculation by Tracer-Tracer Regression (Slope Method)**

- **Figure S27.** A bar chart showing the comparison between the TMER slope and the integral methods.(Page 39)
- **Figure S28 & S28b.** Slope method results**.** (Page 40 & 41)

**Supplemental Section 1: Gas Phase Instrument Performance and Calibration:**

The ethane (C2H6) analyzer on board the Airborne Laboratory for Atmospheric Research (ALAR) is a single laser Tunable Infrared Laser Differential Absorption Spectrometer (TILDAS) investigating the C2H6 ro-vibrational transition in the mid-infrared at 2997 cm-1 . The instrument is a stock configuration MINI spectrometer from Aerodyne Research that has been modified at Harvard University to be less susceptible to mechanical and optical interferences brought about by turbulence in an aircraft. To that end, the instrument case was reinforced and the optical mounting system was stiffened to combat high and low frequency vibrations translating from the frame of the aircraft to the optical bench of the instrument.

Figure S1 is an Allan variance plot showing C2H6 time series during a clean air transect from ALAR. It shows that at 1s resolution the instrument noise is roughly 50ppt but when the signal is averaged to 29 seconds a precision of 10ppt can be obtained.


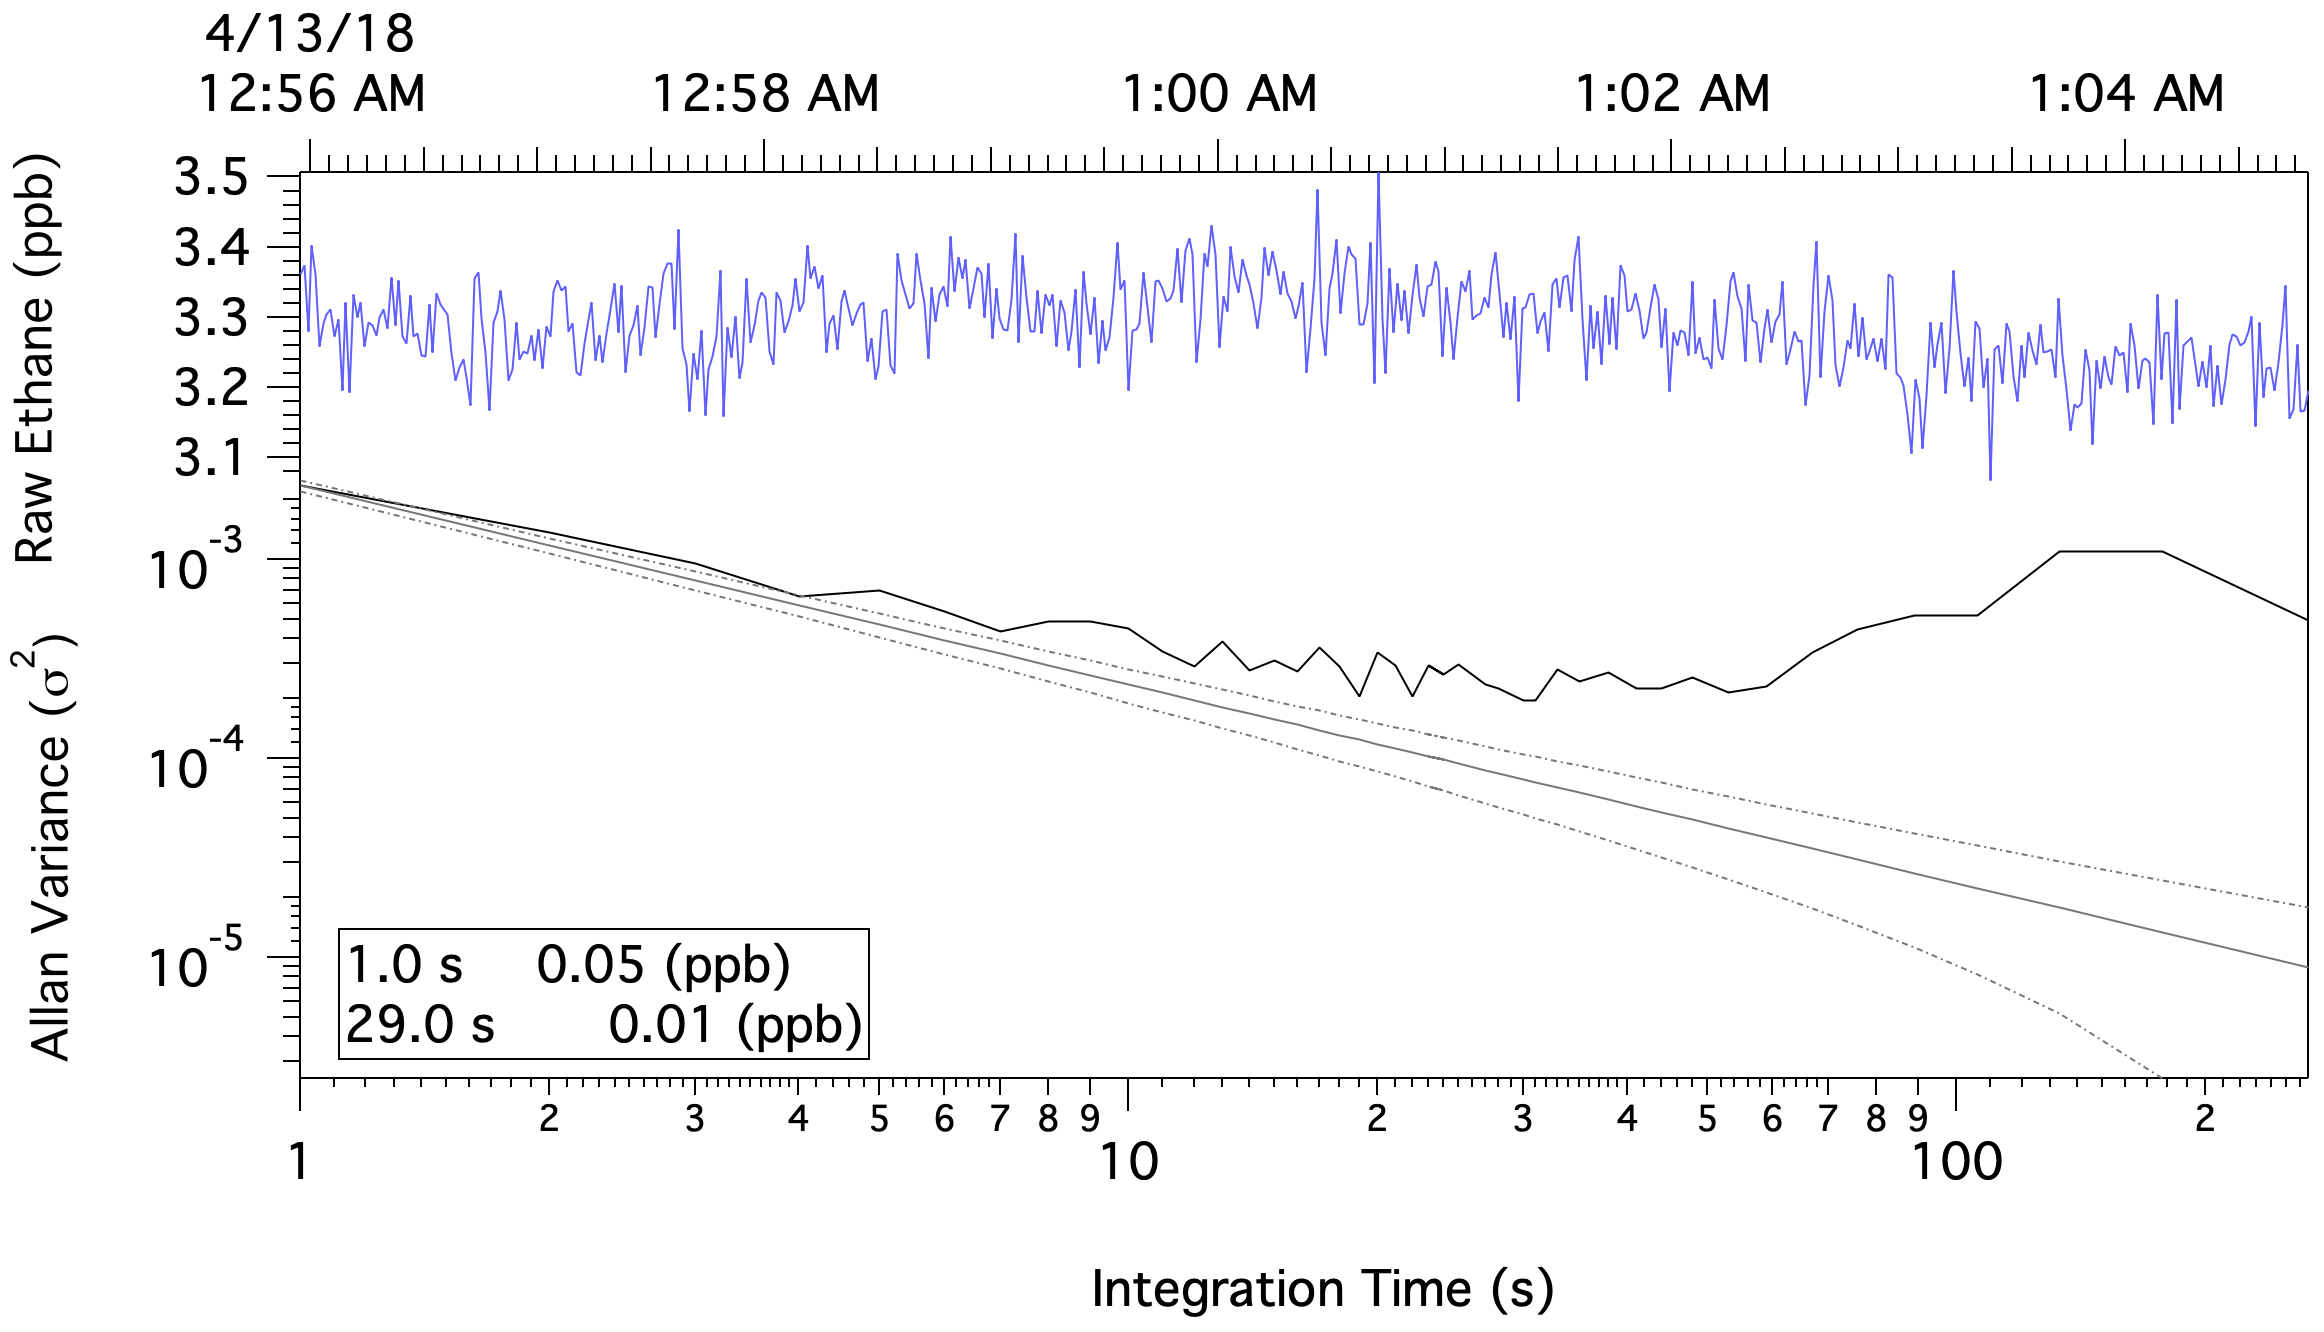


Figure S1 **An Allan variance plot showing the performance of the C2H6 spectrometer during a flight at the end of the summer campaign.**

The Aerodyne TILDAS system has a long history of maintaining a stable calibration slope on top of a floating background (intercept). (Gvakharia et al., 2018; Santoni et al., 2014) In order to establish a zero background for the TILDAS system we supplied the inlet with an overblowing stream of ultra-zero (hydrocarbon free) air at intervals of roughly 10-15 minutes during the flights. Overblows were supplied for roughly 45 seconds such that the instrument sample path was allowed to flush and reach a steady state. We then interpolated through these zero points and then fit with a loess smoother (using the *loess()* function found in the R the *stats* package) and quantify the floating zero. Subtracting this “zero background” gives us the un-calibrated mixing ratio. Although the direct absorption spectroscopic method employed by the TILDAS system has been historically called an absolute method by some, we elect to quantify any error in the tuning rate of the laser and the fitting parameters of the spectra using an overblow calibration gas tied to the NOAA Global Monitoring Division reference scale. The reference cylinder used in this case is NOAA Cylinder ND65910 and contains 1.51 ppb of C2H6 as determined by NOAA GMD on their Gas Chromatography – Mass Spectrometer (GC-MS) system. The appropriate calibration certificate can be provided for any gas phase standards on request.

Because our group only owns a single C2H6 standard, as the monetary cost of owning and maintaining multiple standards measured by NOAA GMD is a significant operational constraint, secondary standards were made and used in the aircraft missions. In order to make the secondary standards for the summer and winter flights, dry breathing air was transferred to a dried carbon-fiber cylinder similar to those used in the HIPPO QCLS gas deck (Santoni et al., 2014). The standard tanks were calibrated against Cylinder ND65910 in the lab. In this campaign there were three separate inflight calibration standards used. Standard Tank 1 (Std. 1), Std. 2, and Std. 3. Calibrations of the flight tanks used for the fall flights (Std. 1 and Std. 2) occurred on February 2nd  and the calibration of summer flight calibration tank (Std.3) was done on 2018-03-14. The calibration procedure of all secondary standards was identical. Std. 1 was used for the flights on 2017-06-19 and 2017-06-06 and was determined to contain 5.66 ppb C2H6. Std. 2 which was used for the rest of the flights in 2017 was determined to contain 1.96 ppb C2H6 and Std 3 which was used for all of the flights in 2018 was determined to contain 3.07 ppb C2H6. Like the zero injection, calibration gas was administered via. overblow inlet injection into the instrument and the mixing ratio was allowed to come to steady state. Calibrations were delivered every 15 minutes during the initial flights of 2017 but after verifying that the calibrations were stable and not time variant the frequency was decreased to roughly 2-3 times per flight in order to minimize the number of inlet interruptions and maximize our effective sampling time while in-flight. Missing data caused by calibration and zero air injection was filled by linear interpolation.

The methane (CH4) analyzer on board ALAR is a stock Picarro G2301m cavity ring-down instrument. This instrument has been flown on many ALAR field campaigns and has been documented substantially in the literature, most recently in Hajny et al. 2019. This instrument has been in near continuous use on board ALAR since 2013. This instrument is traditionally calibrated using a three-point inlet injection calibration while the instrument is in flight. The calibration gasses used for this calibration are primary standards prepared by NOAA Global Monitoring Division in the spring of 2015. The tank values and corresponding certificate numbers are as follows (1771.0 ppb CH4, 375.89 ppm CO2, FB03917-A; 2574.8 ppb CH4, 399.52 ppm CO2, FB03961-A; 3321.0.0 ppb CH4, 433.8 ppm CO2, FB03949-A ). Besides a step change in the calibration after a maintenance event at the manufacture in the summer of 2015 the CH4 calibration slope of this instrument has varied about the mean with standard deviation of roughly 0.1%, since November of 2016. The CH4 offset has also been temporally stable at roughly 12ppb and varying with a one standard deviation of only 5.6% since November of 2016. Historical calibrations for the lifetime of the instrument (spanning the time frame of the measurements reported in this manuscript) are shown in Figure S2, note that the post maintenance calibration factor was used for this study.

Figure S2 **Historical calibration factors spanning the life of the Picarro instrument.** Note that the “post-maintenance” calibration factor was used in this study and encompasses calibrations post-2016.

Because of space limitations onboard the aircraft associated with the addition of the Aerodyne C2H6 analyzer we were not able to bring all three calibration cylinders on board these flights to perform the traditional three-point calibration. We were however able to bring the FB03949-A calibration cylinder and used periodic injections of this to ensure that the instrument was operating withing the calibration regime that we have been accustomed to observing and then verify the instrument with a three-point calibration before and after each deployment. Based on the inflight injections of FB03949-A and the stable calibration for this instrument, we are confident that we can report our data with an accuracy of less than 5% when referenced to the NOAA Global Monitoring Division WMO-CH4 -X2004 and WMO-CO2 -X2007 scales.

**Supplemental Section 2: Natural Gas EMERs and Tabulated Results:**

Supplemental Table 1 (ST1) shows the tabulated results from the airborne sampling campaign described in the manuscript. It also shows the city specific EMER used to calculate the fraction of the total CH4 flux that can be attributed to natural gas emissions in each city presented as the 10 day mean ± 1sd. Because the actual residence time of natural gas within an urban area is highly dependent on the total volume of the distribution network and fluctuations in the end-use demand, a period of 10 days prior to the sampling flight was chosen in order to best account for fluctuations in the EMER in the uncertainty of the computed TMER. In the case of the flights over Baltimore, MD and Washington, D.C. the EMERs from two measurement points were averaged to account for compositional differences in the distribution infrastructure of the two cities. The web URLs for the informational posting sites maintained by the pipeline companies are included below in ST1 and while some of the companies only make the previous 90 days available for download, EMER data for the time periods of our measurement campaigns can be provided upon request.

Supplemental Table 1 (ST1) **Operating parameters and results from the experiment described in the manuscript.** Error terms in column 4 denotes 1 standard deviation. Error terms in columns 5,6, and 7 denote 95% confidence intervals. Column 8 denotes whether or not an MDI was computed for this flight. In cases where there was no MDI, the linear background described in the manuscript was used.

| **City** | **Date** | **Gas Quality Measurement Location** | **Gas Quality Ratio (10d mean +/- 1sd ) C2H6:CH4 (mol/mol)** | **Normalized Ratio to CH4:C2H6** | **Normalized Ratio to CH4: CO2** | **Estimated fraction Thermogenic** | **Model Derived Inflow (MDI) Required?** |
| --- | --- | --- | --- | --- | --- | --- | --- |
| Boston MA | 8/29/17 | Boston Gas "24 Line”1 | 0.020  [0.019, 0.021] | 0.0174 | Summer Flight (NA) | 0.853  [0.811, 0.899] | NA |
| Boston MA | 4/9/18 | Boston Gas "24 Line”1 | 0.020  [0.017, 0.022] | 0.017  [0.016, 0.018] | 240.2 [228.7, 266.4] | 0.872  [0.779, 0.991] | ✔️ |
| Chicago, IL | 6/6/17 | Station 37207, Kinder Morgan NGPC2 | 0.050  [0.047, 0.060] | 0.034 | Summer Flight (NA) | 0.673  [0.563, 0.837] | NA |
| Chicago, IL | 3/15/18 | Station 37207, Kinder Morgan NGPC2 | 0.050  [0.052, 0.059] | 0.038  [0.032, 0.049] | 201.1  [171.9, 260.1] | 0.716  [0.669, 0.771] | ✔️ |
| Indianapolis, IN | 3/16/18 | Zionsville3 | 0.067  [0.064, 0.070] | 0.042  [0.035, 0.066] | 627.7 [461.7, 1157.4] | 0.710  [0.693, 0.729] | ✔️ |
| Indianapolis, IN | 6/19/17 | Zionsville3 | 0.065  [0.062, 0.068] | 0.017 | Summer Flight (NA) | 0.267  [0.256, 0.279] | NA |
| New York, NY | 9/2/17 | Williams Station 5054 | .020  [0.020, 0.020] | 0.016 | Summer Flight (NA) | 0.815  [0.809, 0.820] | NA |
| New York, NY | 3/20/18 | Williams Station 5054 | 0.021  [0.021, 0.021] | 0.025  [0.024 , 0.026] | 267.9  [250.0, 281.7] | 1.188  [1.16, 1.21] | ✔️ |
| Philadelphia, PA | 8/28/17 | Williams Station 2005 | 0.023 | 0.008  [0.005, 0.037] | Summer Flight (NA) | 0.384  [0.254, 1.61] | ✔️ |
| Philadelphia, PA | 4/26/18 | Williams Station 2005 | 0.024  [0.021, 0.027] | 0.018 | 142.0 | 0.746  [0.672, 0.840] | NA |
| Washington, DC, BLT, MD | 8/27/2017 | Rock Creek and Rockville6,7 | 0.036  [0.035, 0.038]  0.036  [0.031, 0.041] | 0.010 [0.008, 0.011] | Summer Flight (NA) | 0.277  [0.258, 0.299] | ✔️ |
| Washington, DC, BLT, MD | 3/29/2018 | Rock Creek & Rockville6,7 | 0.043  [0.036, 0.049]  0.088  [0.075, 0.102] | 0.038 [0.031  0.059] | 155.6  [151.3,  157.6] | 0.655  [0.625, 0.689] | ✔️ |
| Richmond, VA | 3/28/18 | 583 - PETERSBURG ST. 8 | 0.097  [0.093 0.101] | 0.030  [0.028, 0.034] | 99.4  [69.0, 122.1] | 0.320  [0.306, 0.335] | ✔️ |

1 <https://infopost.spectraenergy.com/InfoPost/AGHome.asp?pipe=AG>

2  <https://pipeline2.kindermorgan.com/GasQuality/RepMainLinePoints.aspx?code=NGPL&type=4>

3 <https://peplmessenger.energytransfer.com/ipost/PEPL/gas-quality/daily-average-quality-info-by-segment>

4 <http://www.1line.williams.com/Transco/index.html>

5 <http://www.columbiapipeinfo.com/cpginfopost/>

6 <https://infopost.spectraenergy.com/infopost/ETHome.asp?Pipe=ET>

For each city the published EMER from the informational postings and the C2H6:CH4 tracer-tracer slopes of the enhancements observed in the mixing ration data agreed well. Figure S3 shows a tracer-tracer plot of C2H6:CH4 enhancement from NYC in both the summer and winter. The pipeline ratios are plotted as green lines on top of the mixing ratio plot and show strong correlation with the plume, except for the case of a biogenic plume observed during the summer flight which shows a small number of datapoints indicating a CH4 plume that was absent of co-emitted C2H6. This can be seen as points deviating to the right of the pipeline ratio line.

**
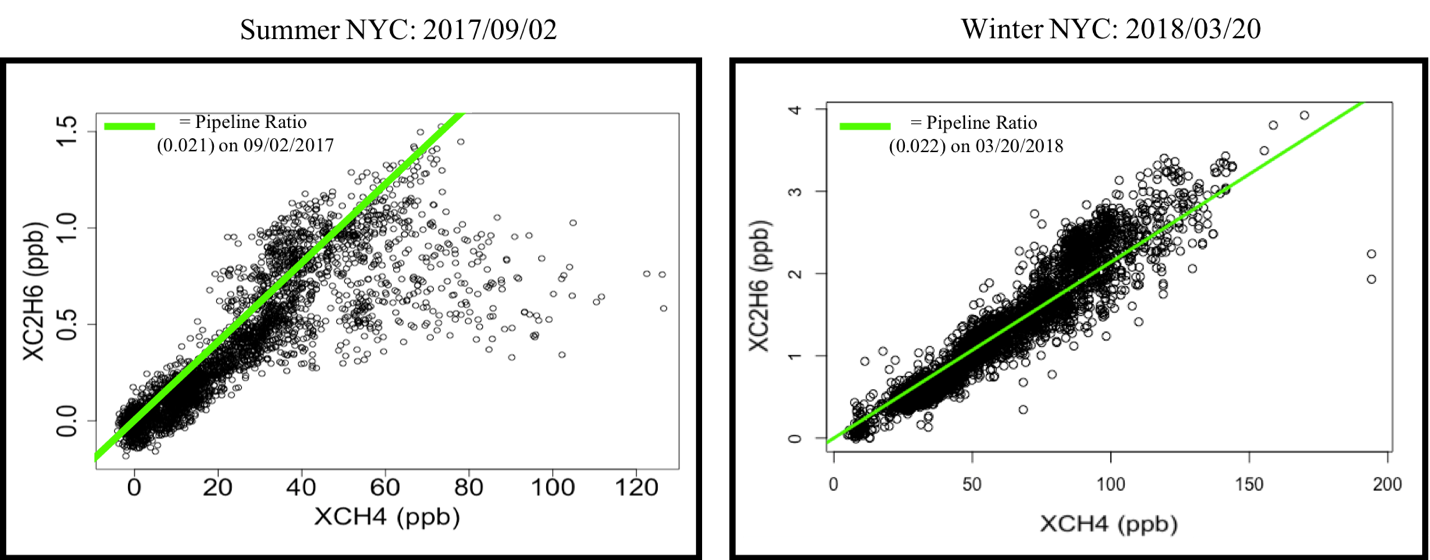
**

Figure S3 **A tracer-tracer plot of the computed enhancements of C2H6 and CH4 (XC2H6 & XCH4) for the summer and winter flight over New York, NY**. The green line shows the reported EMER for the natural gas in the city on the day of the flight. Note that, except for the biogenic enhancement in the summer measurement, the measured enhancements appear to agree well with the EMER slope.

**Supplemental Section 3: Error Analysis in the Computation of the Model Derived Inflow (MDI):**

As mentioned in the manuscript, the Stochastic Time Inverted Lagrangian Transport Model (STILT) has built in functionality to simulate transport in a way to statistically represent not only the transport of an airmass backwards in time but also the uncertainty associated with that estimate. (Fasoli et al., 2018) In order to represent the effect of meteorological error on the transport, STILT increases the various stochastic transport components based on model parameters input by the user, shown in Supplemental Table 2 (ST2).

*Supplemental Table 2 (ST2)* ***Error terms selected from the literature and input into the STILT model to account for possible error in the meteorology driving the simulation of the MDI.***

| **Parameter** | **Value: Literature Source (Pub. Year)** |
| --- | --- |
| standard deviation of horizontal wind errors [m/s] | 2.15….Lin and Gerbig (2005) |
| standard deviation of horizontal wind error timescale [min] | 145…..Lin and Gerbig (2005) |
| vertical correlation lengthscale [m] | 1000…Lin and Gerbig (2005) |
| horizontal correlation lengthscale [km] | 115…..Lin and Gerbig (2005) |
| standard deviation of mixed layer height errors [%] | 39.……………...Gerbig et al. (2008) |
| standard deviation of mixed layer height timescale [min] | 600.…………….Gerbig et al. (2008) |
| horizontal correlation length-scale of PBL height errors [km] | 100……………..Gerbig et al. (2008) |

In the two studies referenced for their literature values of meteorological uncertainty, shown in ST2, the authors analyzed the uncertainties associated with two models, the Eta Data Assimilation System (EDAS), and the European Centre for Medium-Range Weather Forecasts (ECMWF) model. (Gerbig et al., 2008; Lin and Gerbig, 2005) For the transport simulations in this study, the STILT model was driven with the North American Mesoscale Model 12km product (NAMS-12km). NAMS-12km was chosen based on its availability, spatial and temporal resolution, and its coverage over the continental United States. Though this study did not do a model data comparison between NAMS-12km and EDAS, we believe that the NAMS-12km model is better suited to drive transport across small scale domains and that the errors calculated for EDAS and ECMWF, if biased, would be biased high potentially causing a slight overestimate in the error associated with the MDI and thus a slight overestimate of the final uncertainty of the TMER. While this is not optimal, there is currently no other comprehensive meteorological model-data comparison that we are aware of that presents uncertainty parameters suited for the STILT transport model that is also tailored to the NAMS-12km model product.

Figure S4 shows an example simulation of the MDI for one specific receptor during the flight over the city of Boston, MA on April 9th, 2018 with the predominant wind direction flowing from NW to SE. Panel A shows the particle trajectories of the base simulation and of the one with added transport error. In the case of the simulation with added transport error, one can see that the particles released at the receptor intersect a larger number of points in the upwind flight track (blue) when compared to the particle trajectories of the base simulation (green). As described in the main manuscript, each particle is tagged with the mixing ratio measurement closest to the point where it intersects the upwind transect and a distribution of potential upwind values can be created. Panel B shows the upwind mixing ratio distributions for transport simulations with and without added meteorological error and panel C highlights what mixing ratio points in the upwind transect are selected in order to compute the distributions in panel B.

The transport error for each receptor, as described in equation 2 of the manuscript, was adapted from Lin and Gerbig (2005). One can see that, if there were predominant sources upwind of the domain leading to structure in the upwind mixing ratio, the error associated with the final MDI for a particular receptor would be highly dependent on the contribution from that section of the upwind transect to the downwind mixing ratio observed at the receptor. Figure S5 shows CH4 concentrations for a summer flight over Washington, D.C. and Baltimore, MD with the predominant wind flow from the NE to the SW. In this case, the model is able to predict the MDI and account for the effect of incoming CH4, measured in the NE section of the upwind transect, on the downwind mixing ratio highlighted in Figure S5 panel C. Because the incoming plume is not homogeneously distributed across the horizontal extent of the downwind profile, there is more uncertainty in the computed MDI due to potential transport error than other, more simple, cases such as that shown in Figure S4 in Boston, MA. These added sources of uncertainty are reflected in the final uncertainty estimation of the TMER shown in the manuscript.


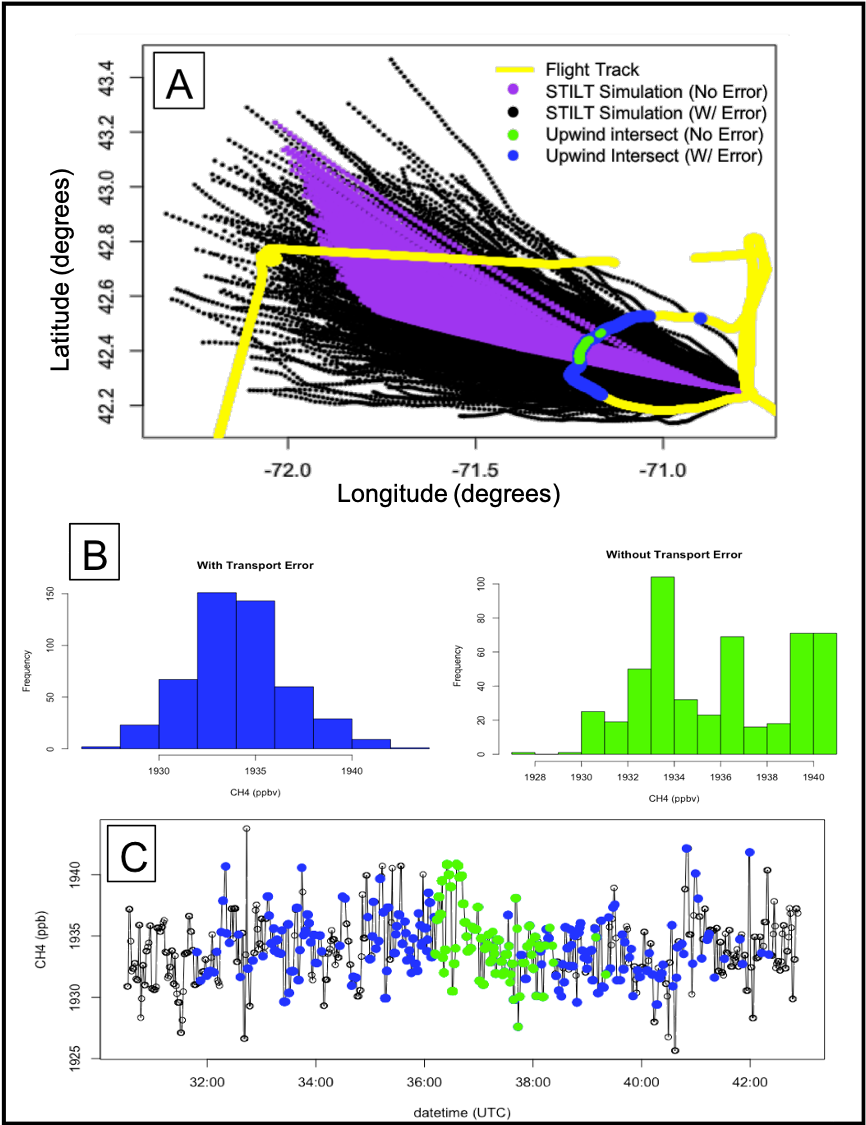


Figure S4 **An example of meteorological model error parameters when determining the MDI.** Panel A shows the particle trajectories of the STILT model when it is run with and without added transport error. Panel B shows the distribution of upwind mixing ratios used to compute the MDI from both transport simulations. Panel C shows where along the upwind transect the particles intersect the timeseries measured by the aircraft.

Figure S5 **MDI Calculated during a flight over Washington D.C. / Baltimore, MD.** Panel A shows CH4 concentrations (ppb) for the summer flight over the Washington, D.C. and Baltimore, MD domain on a day when the predominant wind direction was from the NE to the SW. Note the incoming CH4 plume in the NE corner of the flight track. Panels B.1 and B.2 show the MDI as calculated along the downwind flight track Panel C shows the downwind mixing ratios of ethane and CH4 along with the MDI. Note that the structure in the MDI is due to the fact that there are significant sources in the upwind.

**Supplemental Section 4: Model-Data Comparison of NAMS-12km Meteorology to the Aircraft:**

In order to assess the quality of the NAMS-12km model we have performed a model data comparison between the wind measurements collected on board ALAR by the BAT Probe and the winds predicted by the NAMS-12km model at the point in space and time that ALAR sampled. Wind data from the BAT probe for 3 flights were block averaged at 45 second intervals. Data was then extracted from the NAMS-12km model at the nearest grid box using the *profile.exe* function distributed with the HYSPLIT model. The wind direction error was calculated as the absolute deviation in degrees of the NAMS-12km model from the values reported by the BAT Probe (abs(ALAR-NAMS-12km)). The wind speed error was calculated as the deviation in wind speed of the BAT Probe from the NAMS12 model. (ALAR-NAMS-12km). Time-series data from one selected flight is shown in Figure S6.

**
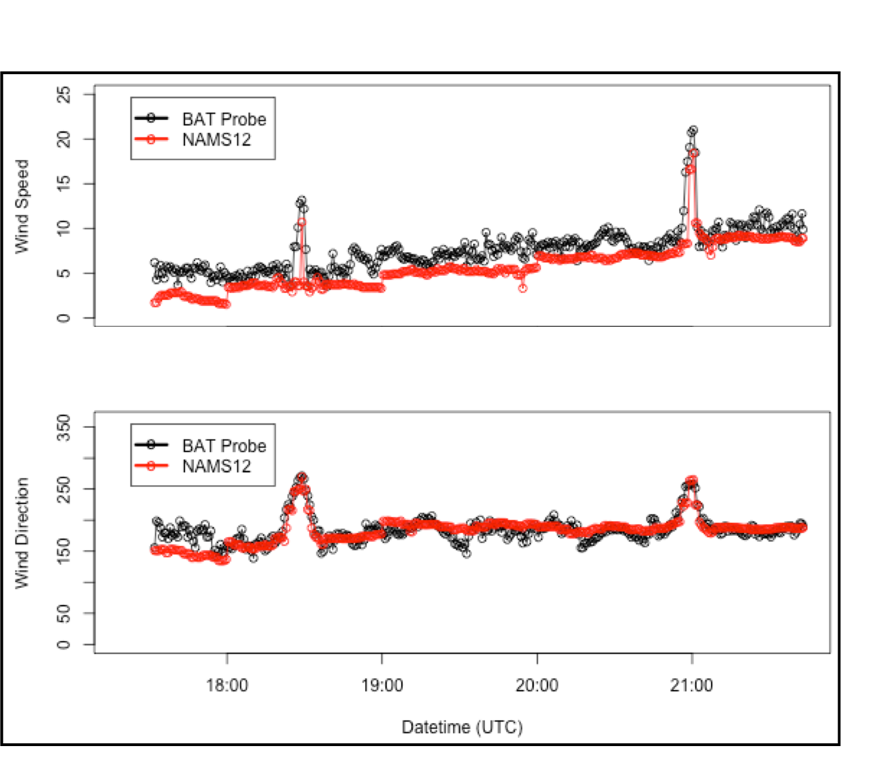
**

Figure S6 **Time series from the model data comparison of NAMS-12km meteorology and BAT prob measurements**. Note the profiles at 18:30 and 21:00 UTC

The resulting distributions of wind direction and wind speed error are shown in Figure S7 (A&B) and were bootstrapped in order to determine a mean with uncertainty bounds. We determined that for the three selected flights the mean direction error was 11.2(degrees) [10.6, 11.9] and that the mean speed error was 1.5 (m/s) [1.33, 1.68] with errors representing the 95% confidence intervals. The bootstrapped distributions of the mean are shown in Figure S7 (C&D).

This error analysis of the NAMS-12km meteorology shows similar horizontal errors as those determined for the EDAS model by Gerbig and Lin. Because their analysis looks at the covariance in the x-dimensions and the error in the vertical mixing, we implemented their suggested error parameters into the STILT model when calculating the MDI as described above in ST2.

**
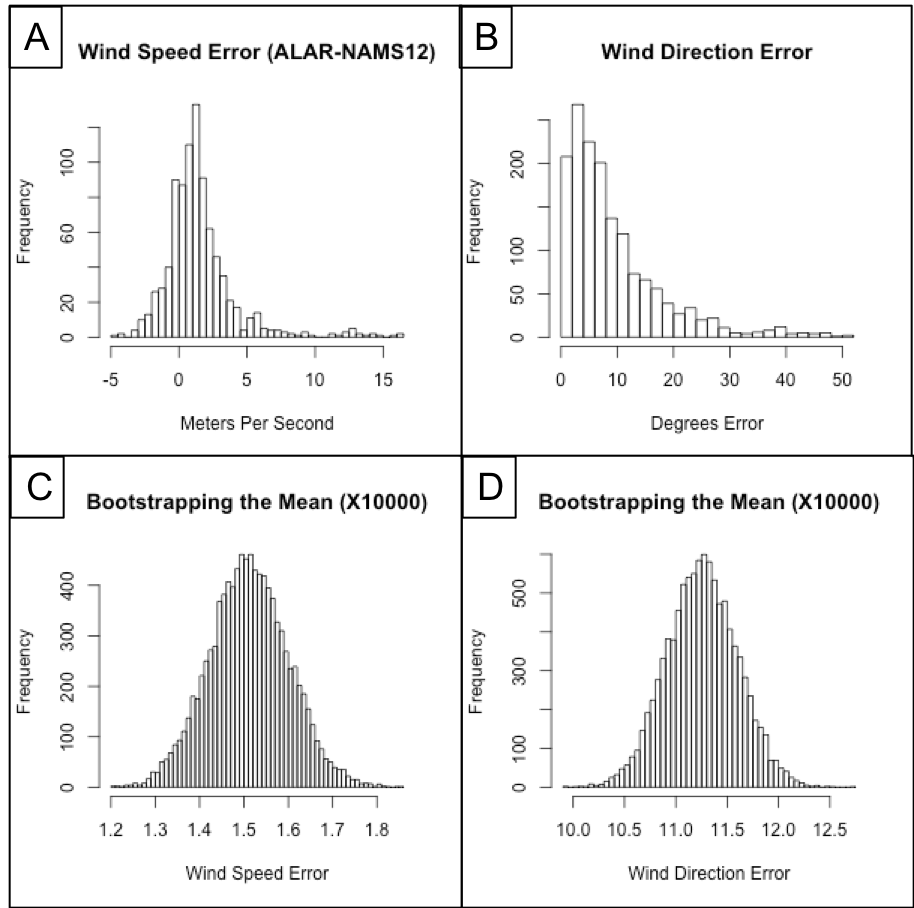
**

Figure S7 **Analysis from three days of BAT Probe meteorological data used to assess the uncertainty in the NAMS12 meteorology fields**. Panels A&B show the raw distributions of the wind speed and wind direction. Panels C&D show the results from bootstrapping the mean of the error distributions.

**Supplemental Section 5: Footprint Analysis and Flux Sensitivity Maps for Each Domain**

The main body of the manuscript describes the footprint calculation used to study the domain sensitivity for each flight. ST3 shows the domain on which the footprint for each city is computed. Below are the flux sensitivity maps generated for each city using the methods described in the main manuscript. Flux sensitivity maps are necessary when attempting to compare the domain sampled on two separate flights. For clarification the US Census Bureau TIGER boundaries are shown on the flux sensitivity maps as well. Figures S8-S21 show the flux sensitivity of the plumes selected to represent each city in this analysis. From the attached figures one can see that the footprint is strongest upwind proximate to the aircraft location and tapers off further into the domain. These gradients signify how much weight emissions from each ground pixel are given in the calculation of the TMER.

All of the flux sensitivity maps show significant influence outside and upwind of the focus domain for each flight. The calculation of the MDI takes any potential emissions from this area into account and subtracts those effects from the downwind transect so that we can attribute downwind enhancements to an exact domain.

*Supplementary Table 3* ***Domain used for the STILT runs to compute the MDI and the ground flux sensitivity.***

| City | Longitude Min | Longitude Max | Latitude Min | Latitude Max |
| --- | --- | --- | --- | --- |
| Philadelphia, PA | -76.26 | -74.33 | 39.33 | 40.56 |
| Boston, MA | -71.50 | -70.37 | 42.00 | 43.00 |
| New York, NY | -74.76 | -72.77 | 40.26 | 41.52 |
| Indianapolis, IN | -86.64 | -85.48 | 39.47 | 40.36 |
| Richmond, VA | -77.96 | -76.91 | 37.12 | 37.90 |
| Washington, DC / Baltimore, MD | -78.00 | -75.85 | 38.50 | 39.8 |
| Chicago, IL | -88.96 | -86.30 | 37.12 | 37.90 |

Figure S8 **Flux Sensitivity Map for a summer flight over Boston, MA: 2017/08/27.** The x and y axis represent longitude and latitude respectively. The color bar indicates the normalized flux sensitivity of the flight track to the ground sources in the domain where lighter colors denote that the aircraft is more sensitive to emissions in those grid boxes. The total flight track is shown in gray and the selected transect is shown in blue. The US Census Bureau TIGER urbanized boundaries are plotted on green for reference.


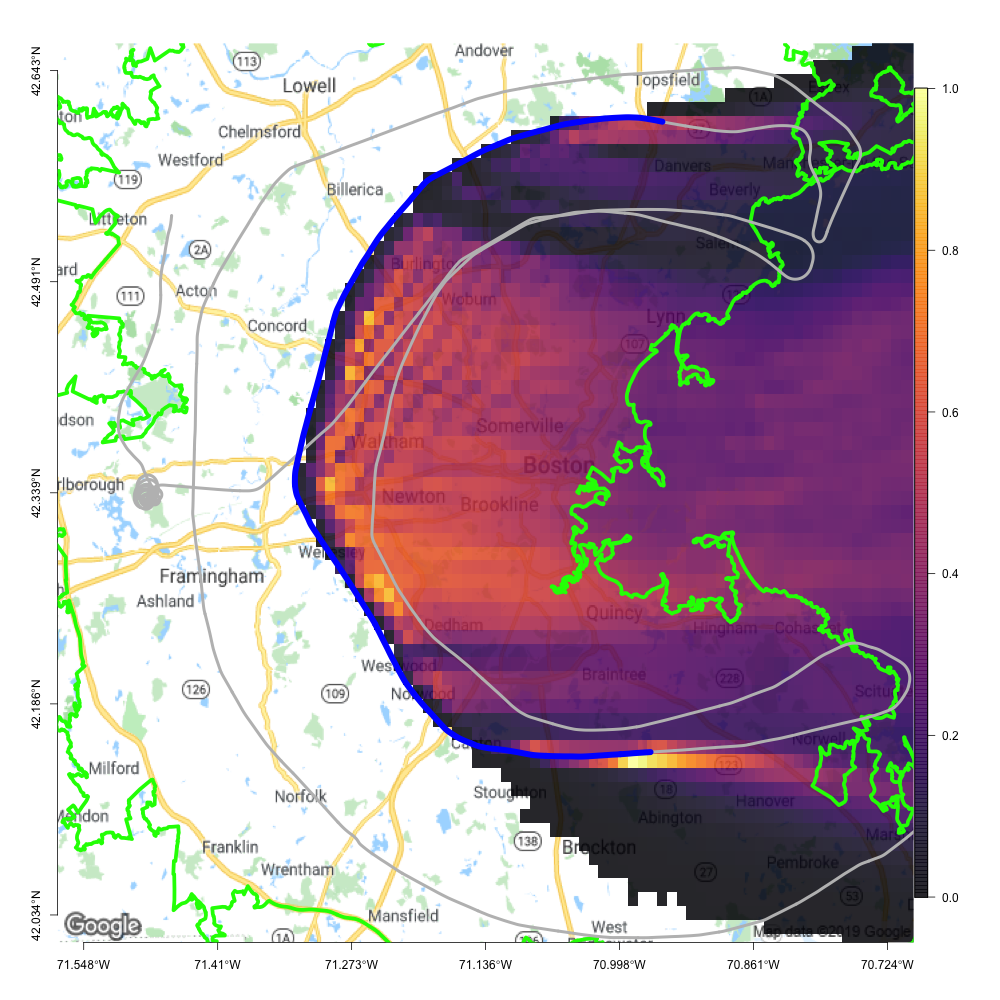

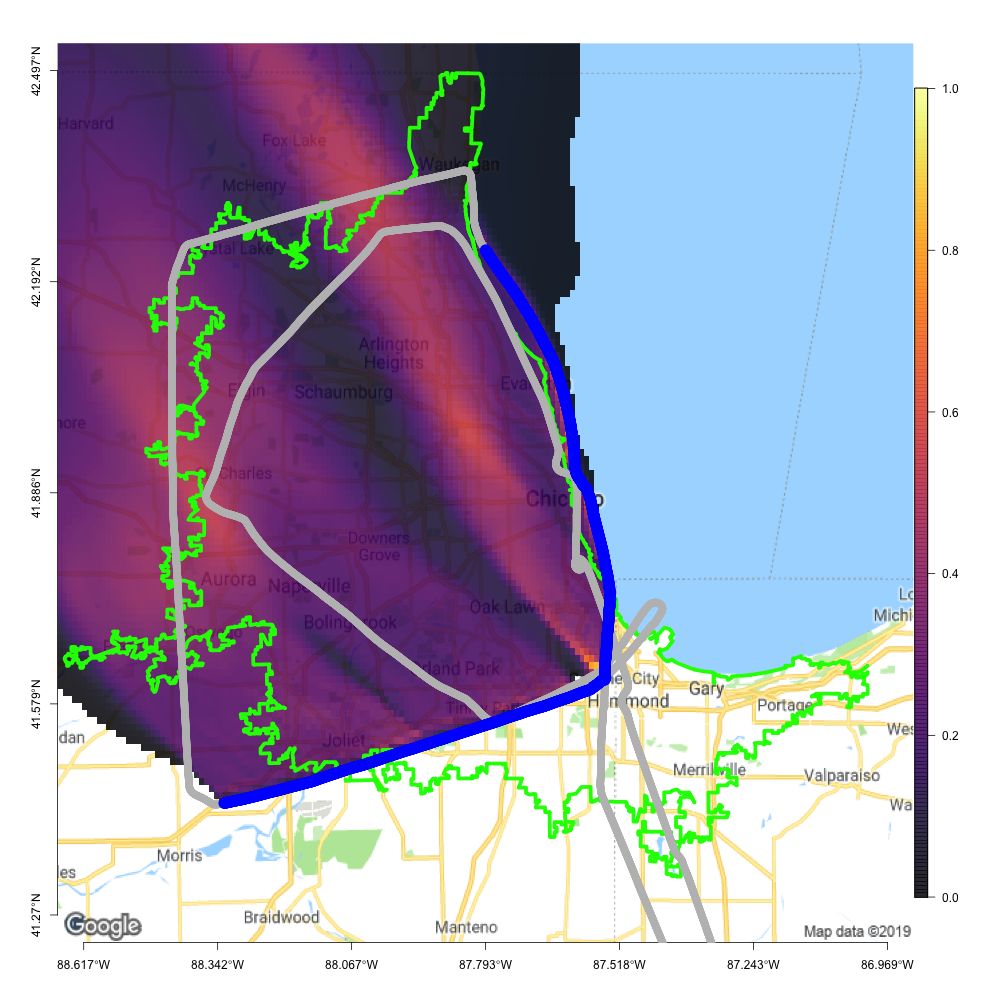


Flight Track

Downwind Transect

TIGER Domain

Normalized

Flux Sensitivity


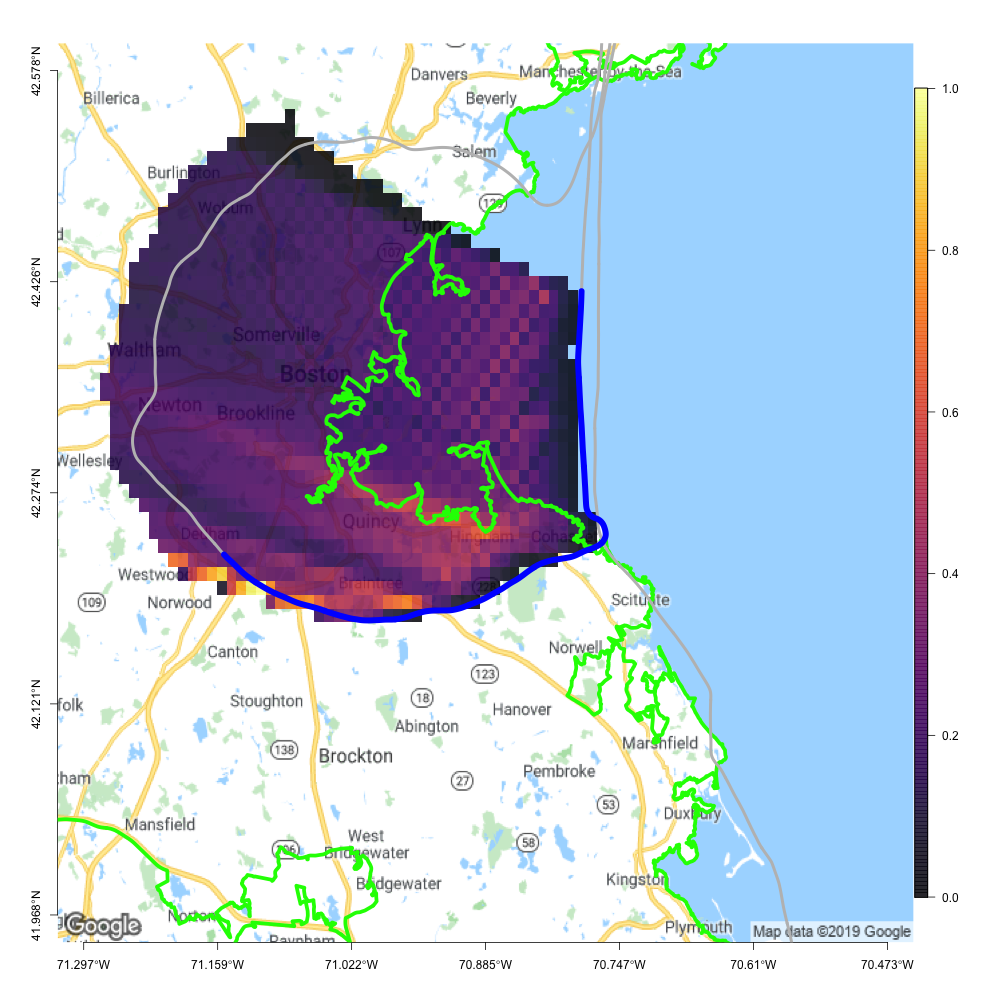


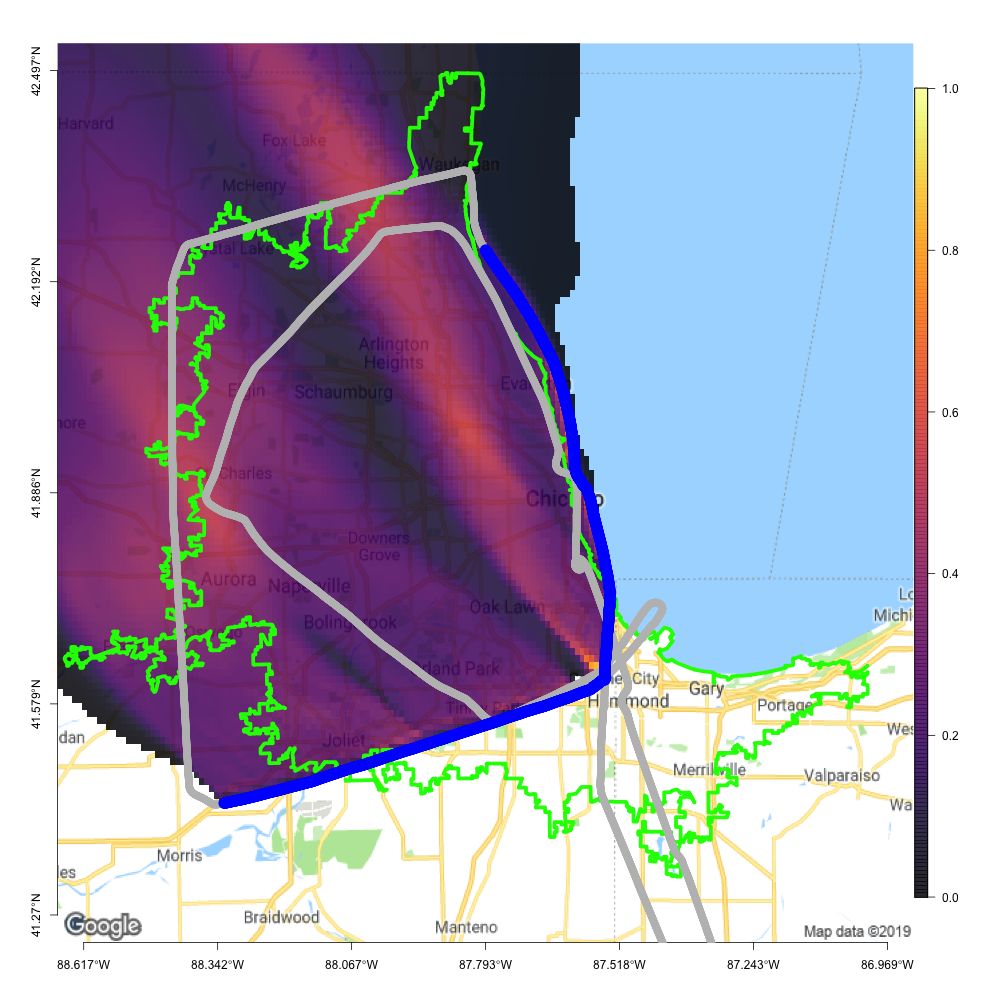


Flight Track

Downwind Transect

TIGER Domain

Normalized

Flux Sensitivity

Figure S9 **Flux Sensitivity Map for a winter flight over Boston, MA: 2018/04/09.** The x and y axis represent longitude and latitude respectively. The color bar indicates the normalized flux sensitivity of the flight track to the ground sources in the domain where lighter colors denote that the aircraft is more sensitive to emissions in those grid boxes. The total flight track is shown in gray and the selected transect is shown in blue. The US Census Bureau TIGER urbanized boundaries are plotted on green for reference.


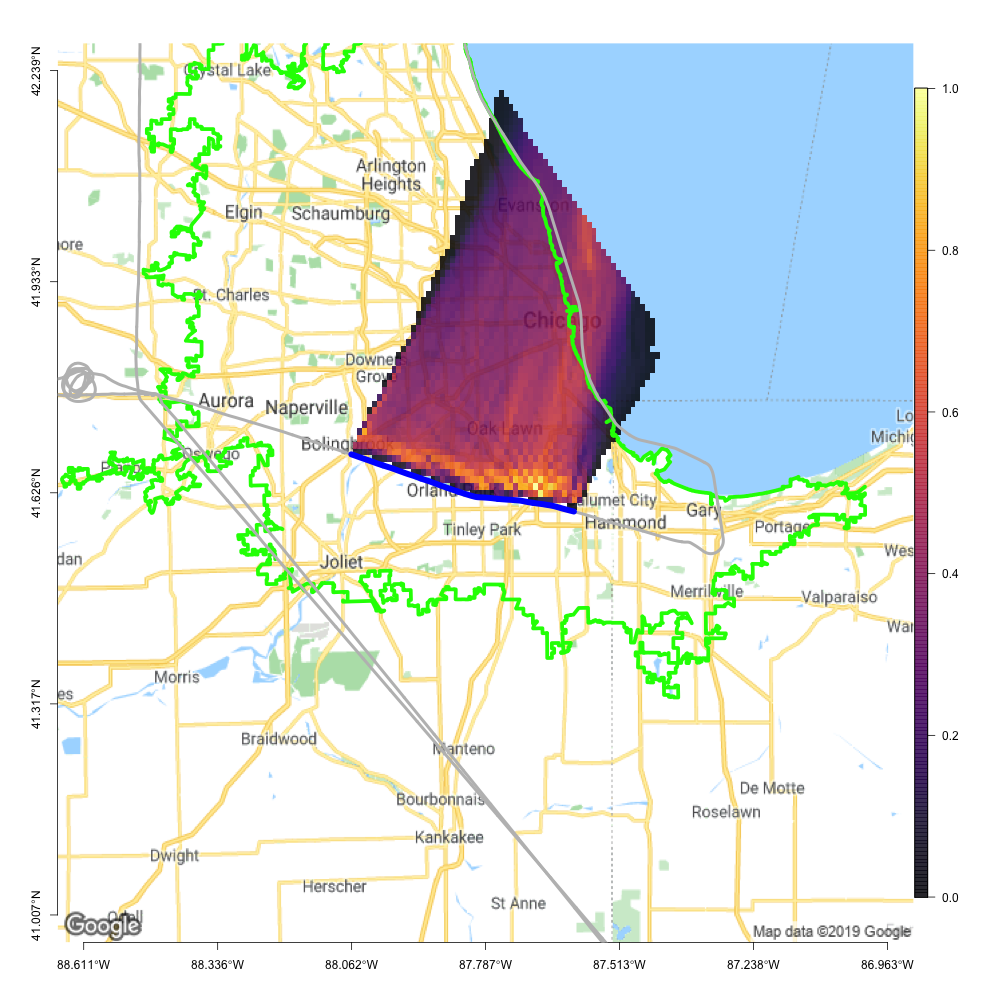

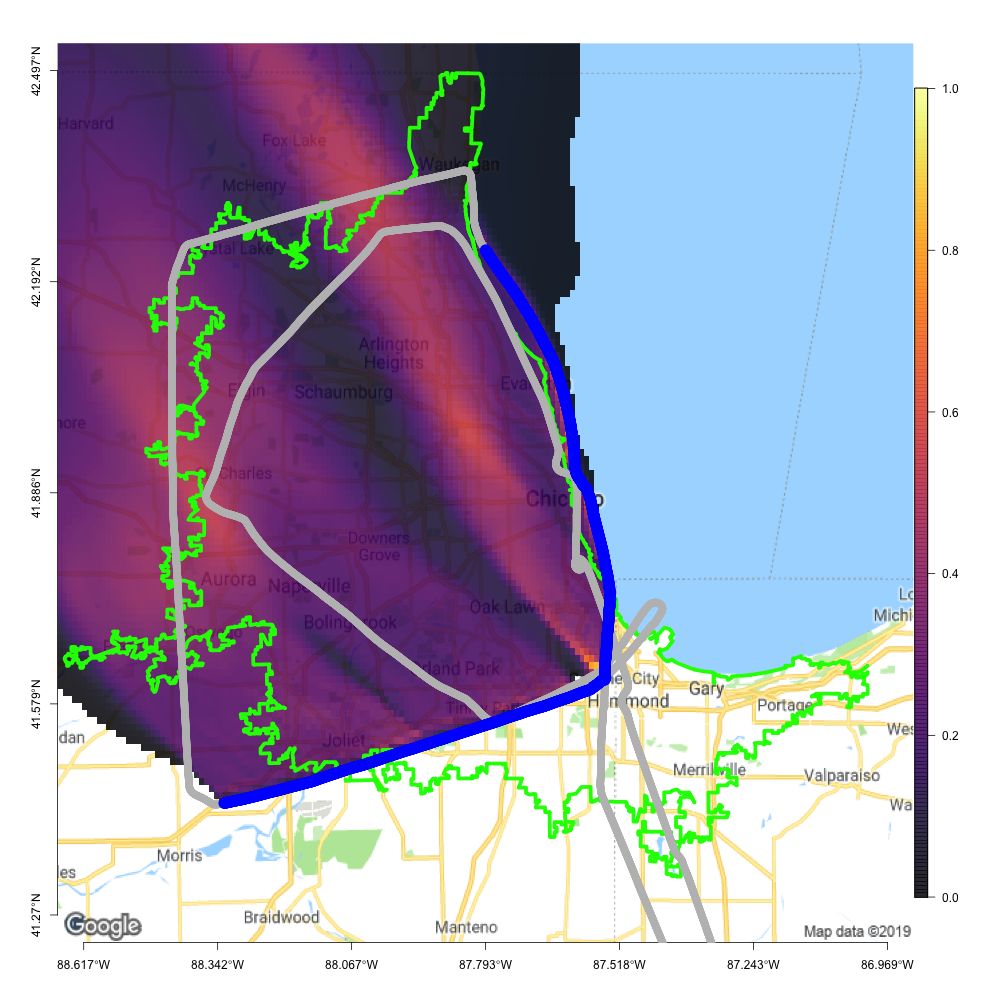


Flight Track

Downwind Transect

TIGER Domain

Normalized

Flux Sensitivity

Figure S10 **Flux Sensitivity Map for a summer flight over Chicago, IL: 2017/06/06.** The x and y axis represent longitude and latitude respectively. The color bar indicates the normalized flux sensitivity of the flight track to the ground sources in the domain where lighter colors denote that the aircraft is more sensitive to emissions in those grid boxes. The total flight track is shown in gray and the selected transect is shown in blue. The US Census Bureau TIGER urbanized boundaries are plotted on green for reference.


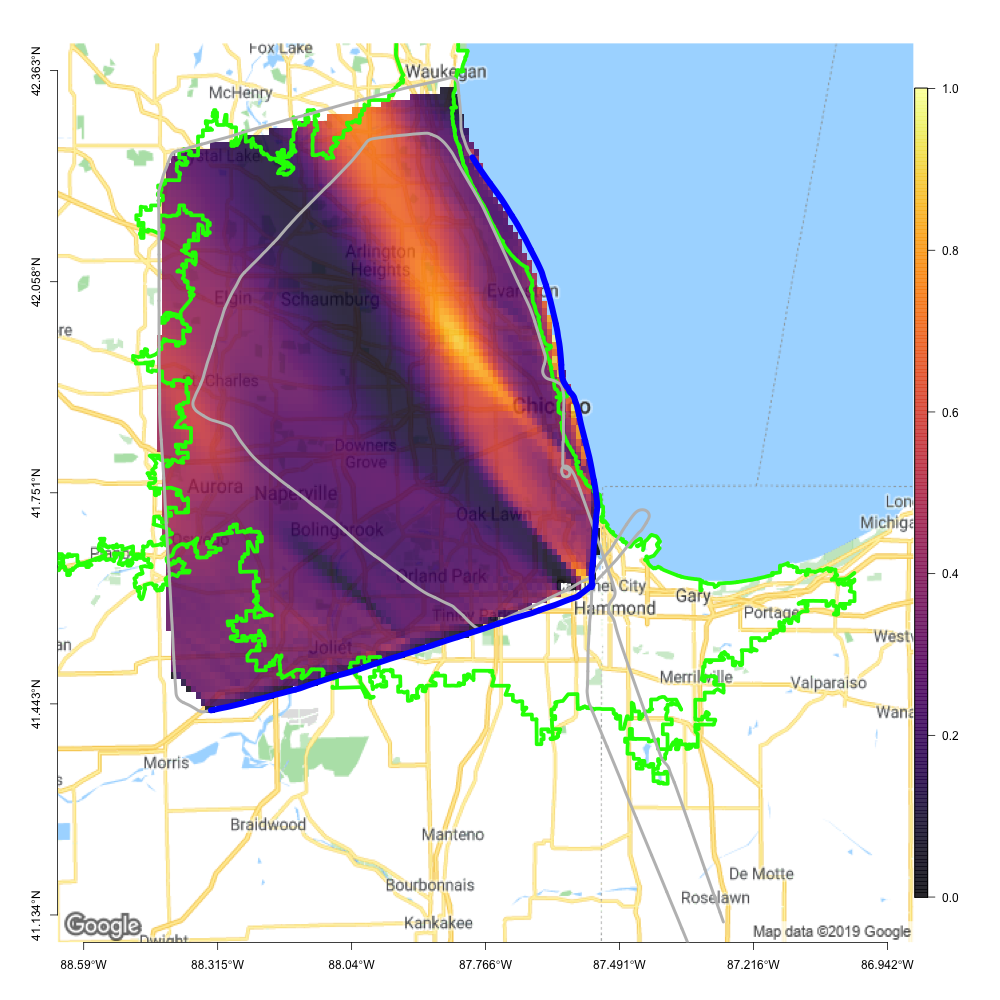


Figure S11 **Flux Sensitivity Map for a winter flight over Chicago, IL: 2018/03/15.** The x and y axis represent longitude and latitude respectively. The color bar indicates the normalized flux sensitivity of the flight track to the ground sources in the domain where lighter colors denote that the aircraft is more sensitive to emissions in those grid boxes. The total flight track is shown in gray and the selected transect is shown in blue. The US Census Bureau TIGER urbanized boundaries are plotted on green for reference.


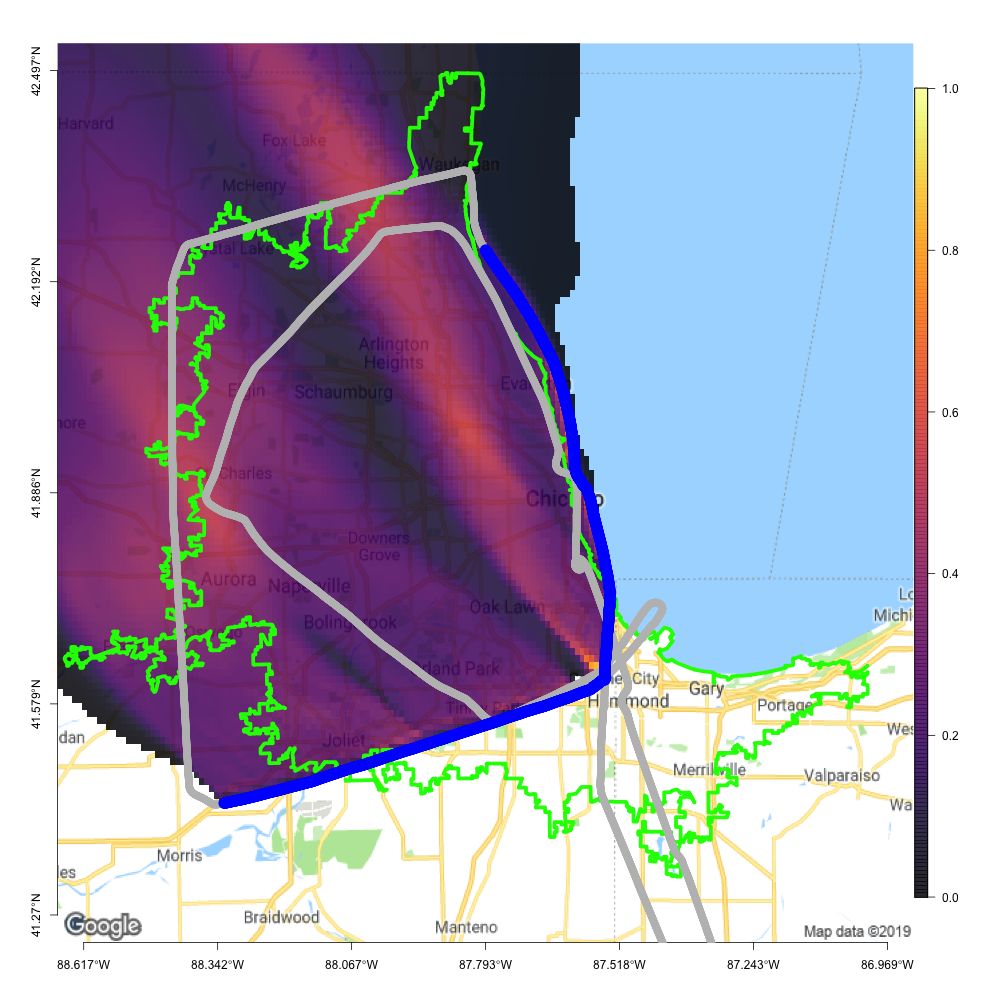


Flight Track

Downwind Transect

TIGER Domain

Normalized

Flux Sensitivity


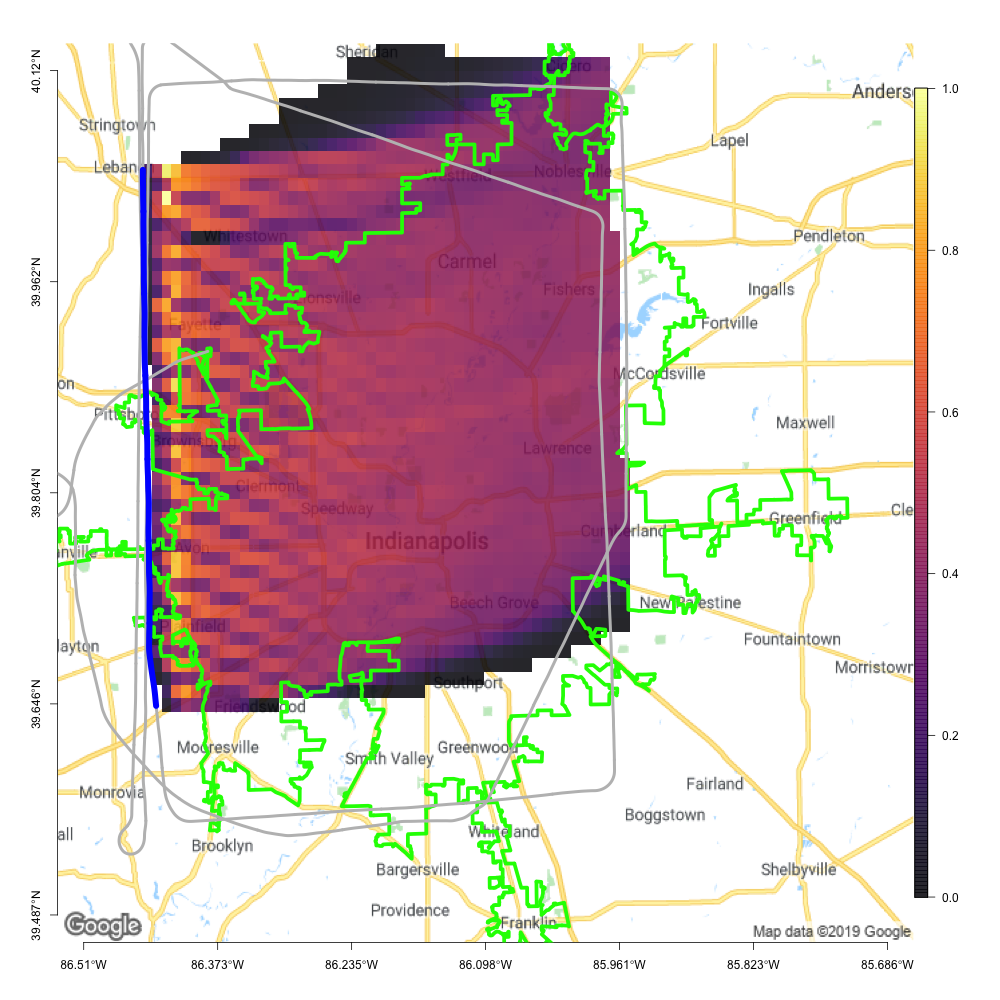


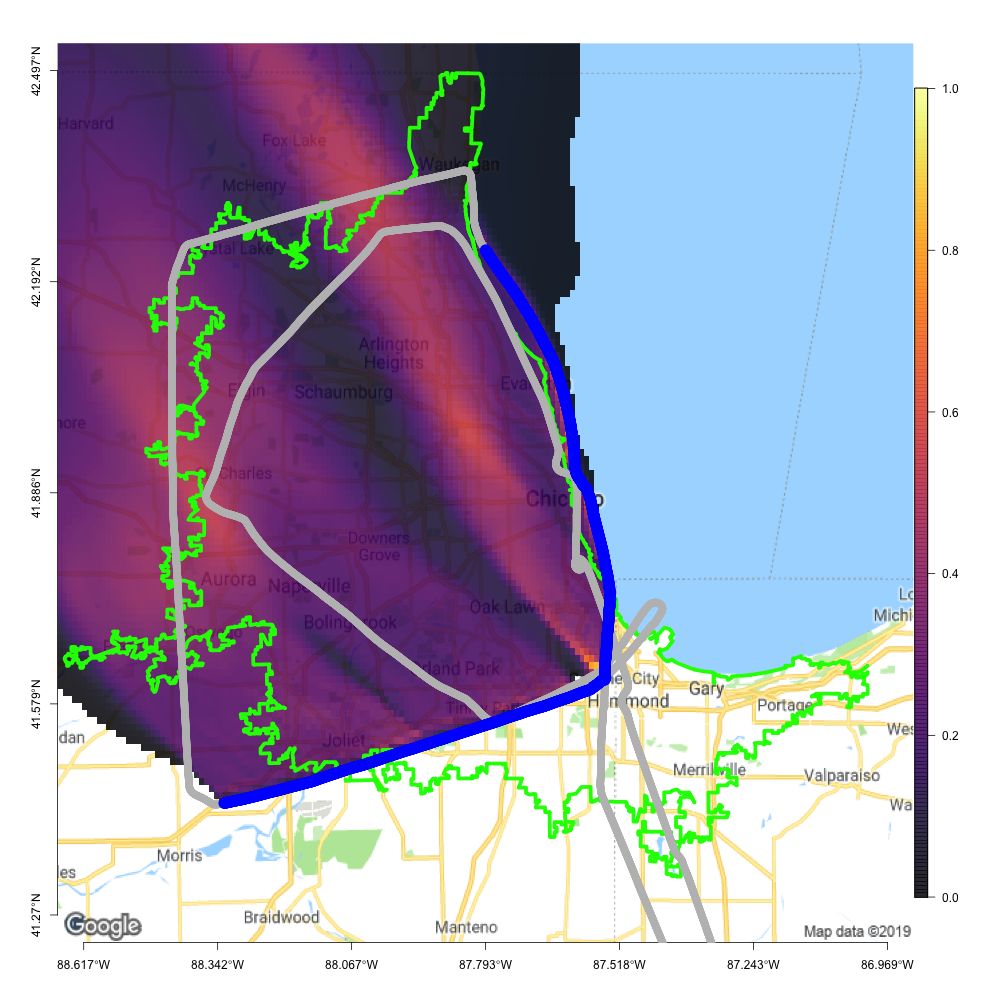


Flight Track

Downwind Transect

TIGER Domain

Normalized

Flux Sensitivity

Figure S12 **Flux Sensitivity Map for a winter flight over Indianapolis, IN: 2018/03/18.** The x and y axis represent longitude and latitude respectively. The color bar indicates the normalized flux sensitivity of the flight track to the ground sources in the domain where lighter colors denote that the aircraft is more sensitive to emissions in those grid boxes. The total flight track is shown in gray and the selected transect is shown in blue. The US Census Bureau TIGER urbanized boundaries are plotted on green for reference.


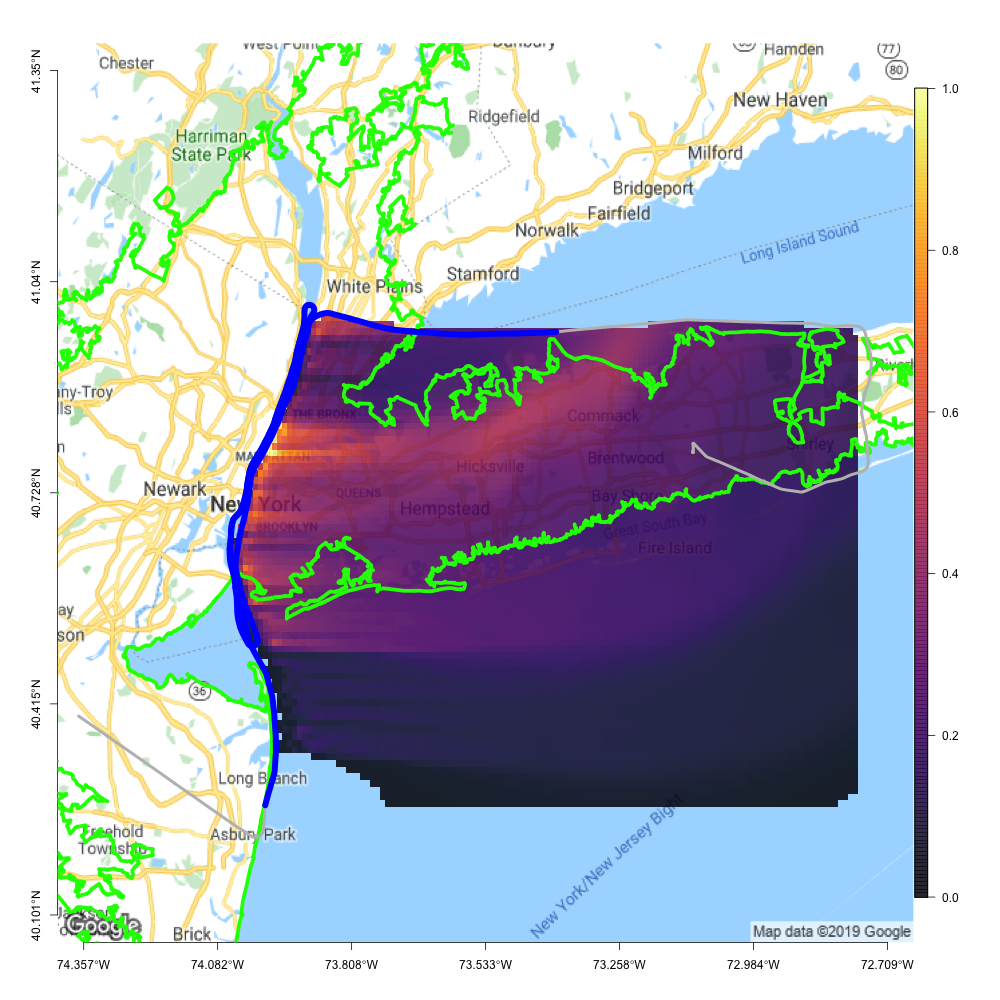


Figure S13 **Flux Sensitivity Map for a summer flight over New York, NY: 2017/09/02.** The x and y axis represent longitude and latitude respectively. The color bar indicates the normalized flux sensitivity of the flight track to the ground sources in the domain where lighter colors denote that the aircraft is more sensitive to emissions in those grid boxes. The total flight track is shown in gray and the selected transect is shown in blue. The US Census Bureau TIGER urbanized boundaries are plotted on green for reference.


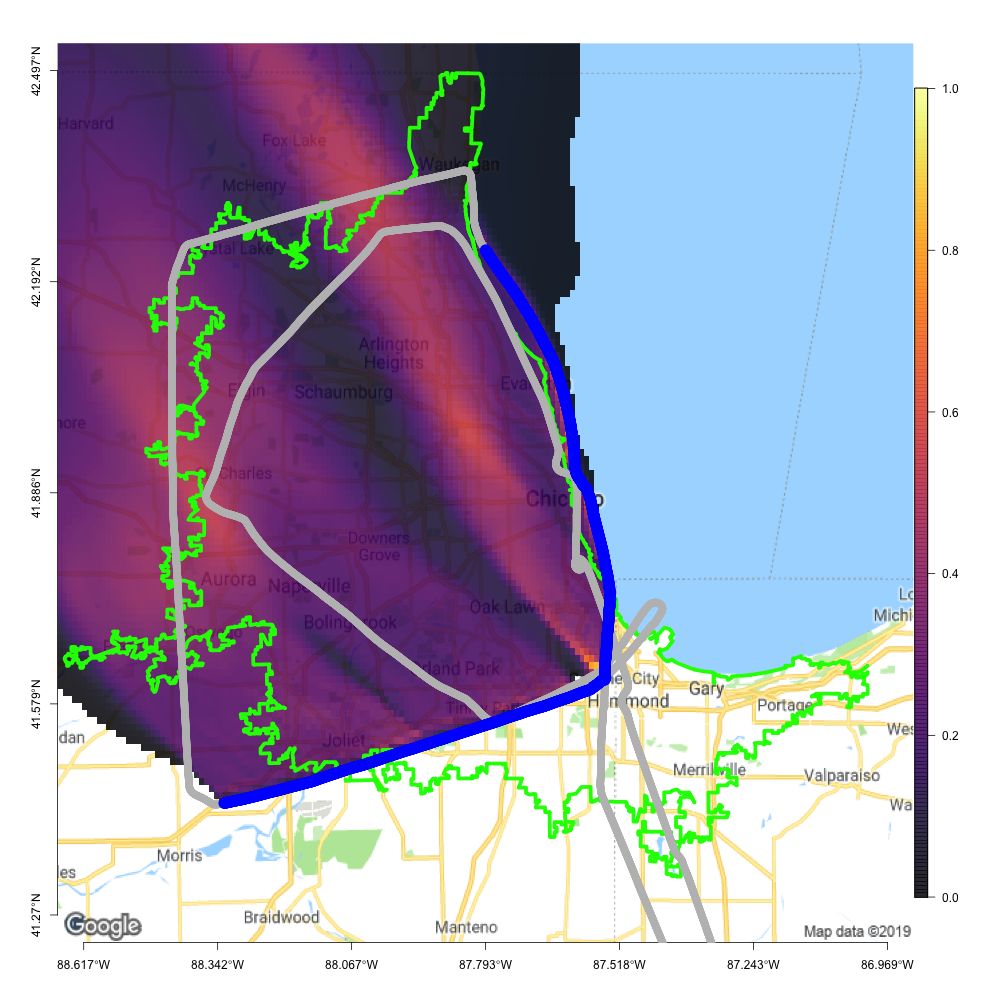


Flight Track

Downwind Transect

TIGER Domain

Normalized

Flux Sensitivity


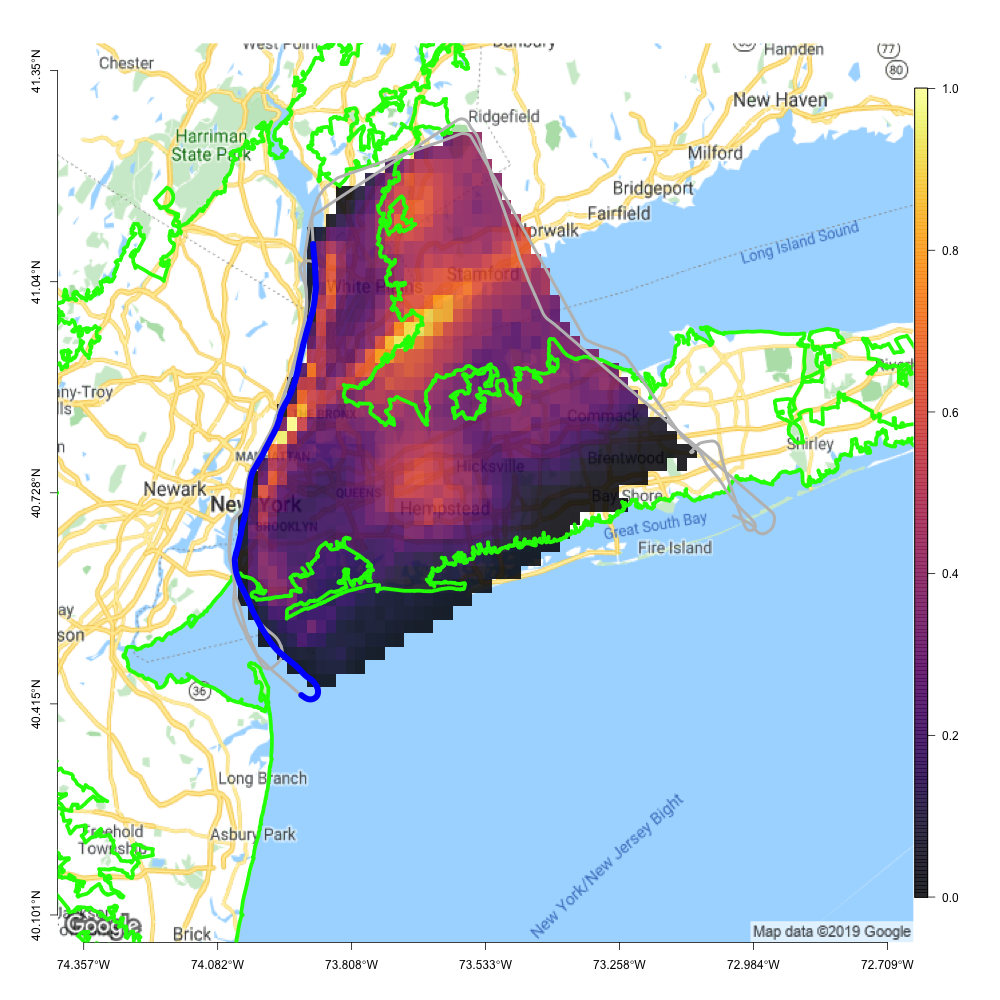


Figure S14 **Flux Sensitivity Map for a winter flight over New York, NY: 2018/03/20.** The x and y axis represent longitude and latitude respectively. The color bar indicates the normalized flux sensitivity of the flight track to the ground sources in the domain where lighter colors denote that the aircraft is more sensitive to emissions in those grid boxes. The total flight track is shown in gray and the selected transect is shown in blue. The US Census Bureau TIGER urbanized boundaries are plotted on green for reference.


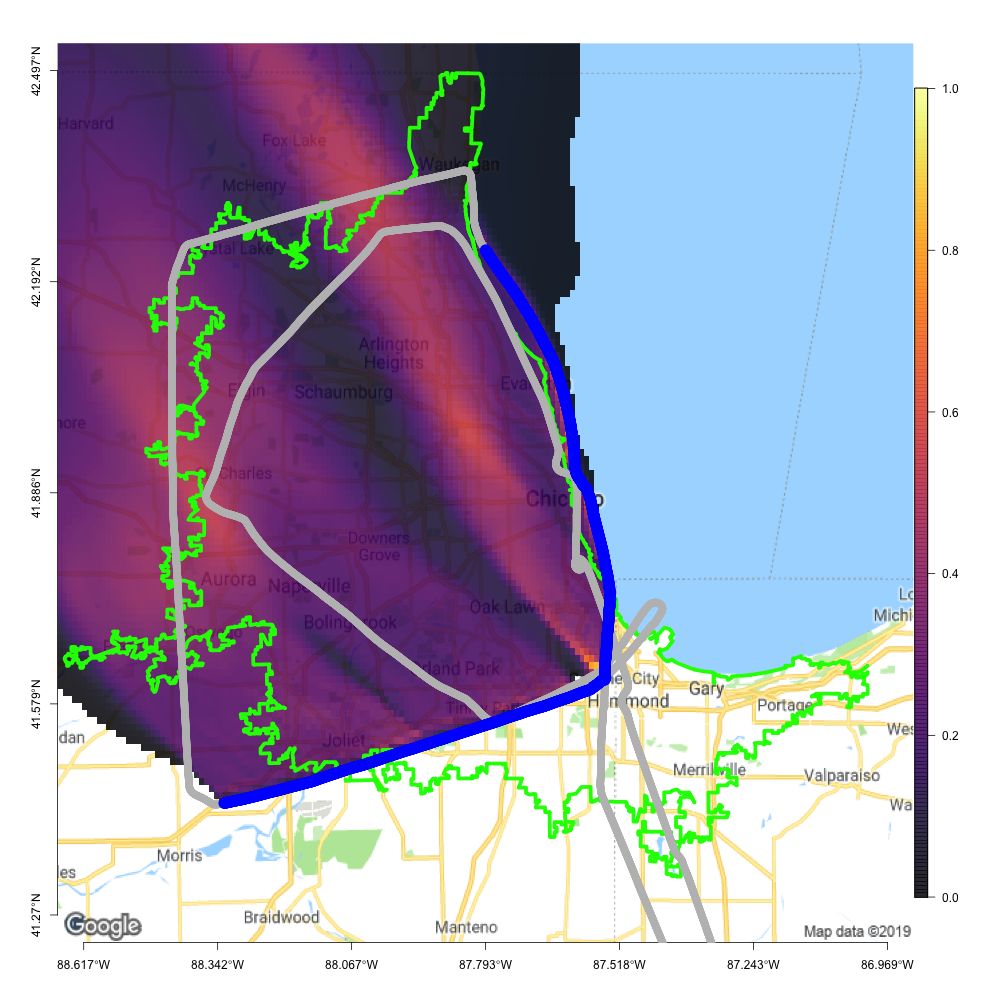


Flight Track

Downwind Transect

TIGER Domain

Normalized

Flux Sensitivity


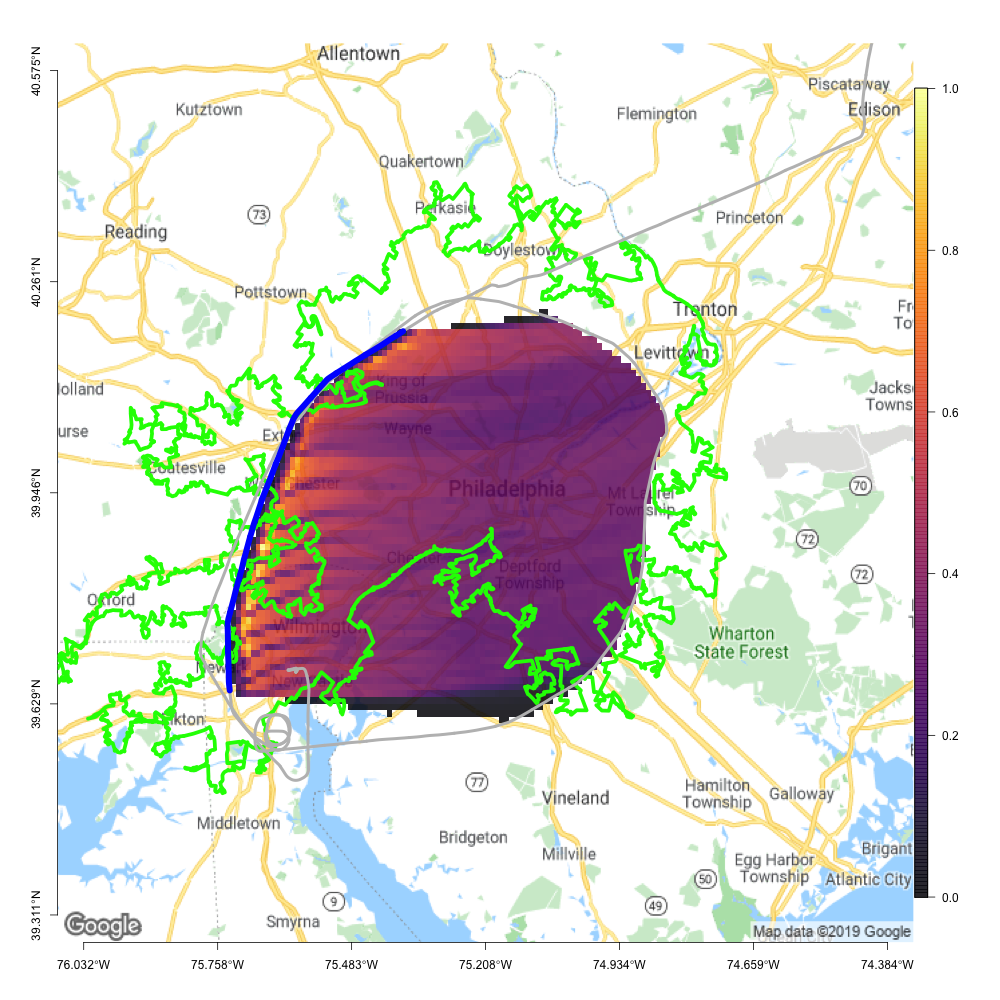


Figure S15 **Flux Sensitivity Map for a Summer flight over Philadelphia, MA: 2017/08/28.** The x and y axis represent longitude and latitude respectively. The color bar indicates the normalized flux sensitivity of the flight track to the ground sources in the domain where lighter colors denote that the aircraft is more sensitive to emissions in those grid boxes. The total flight track is shown in gray and the selected transect is shown in blue. The US Census Bureau TIGER urbanized boundaries are plotted on green for reference.


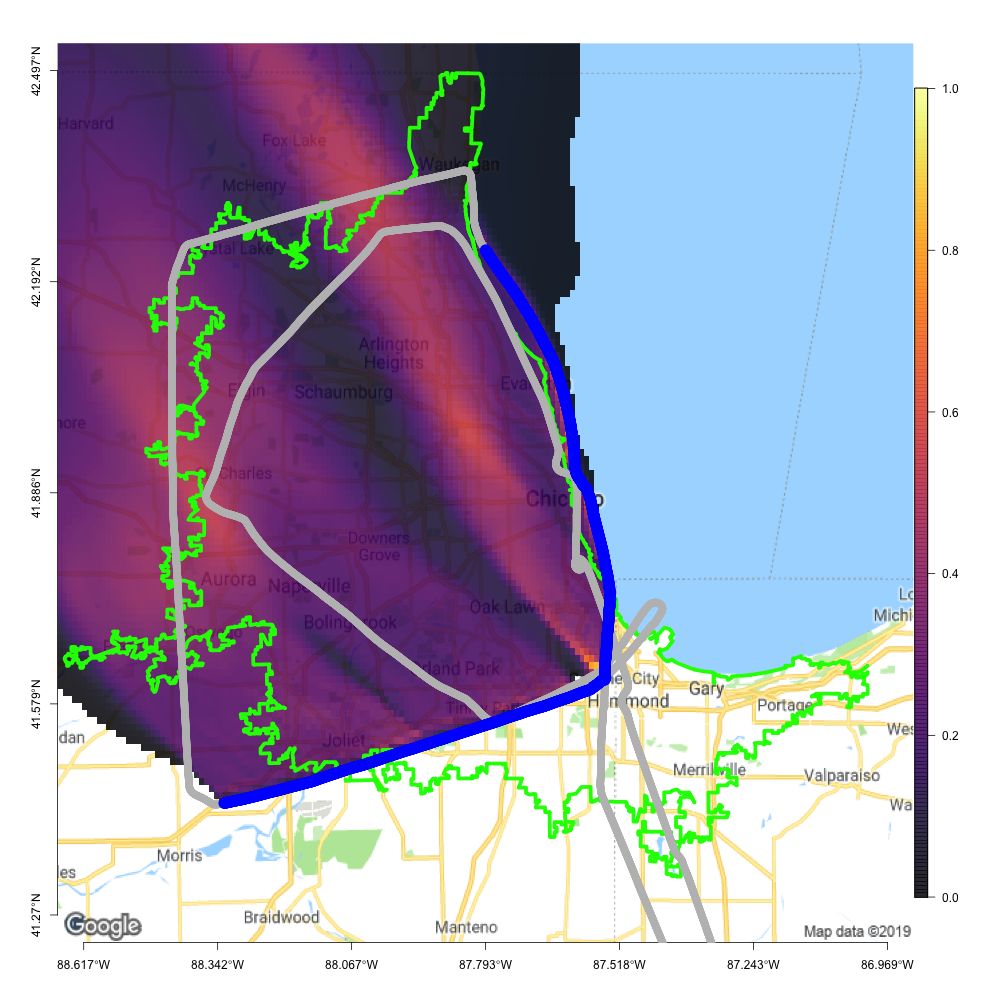


Flight Track

Downwind Transect

TIGER Domain

Normalized

Flux Sensitivity


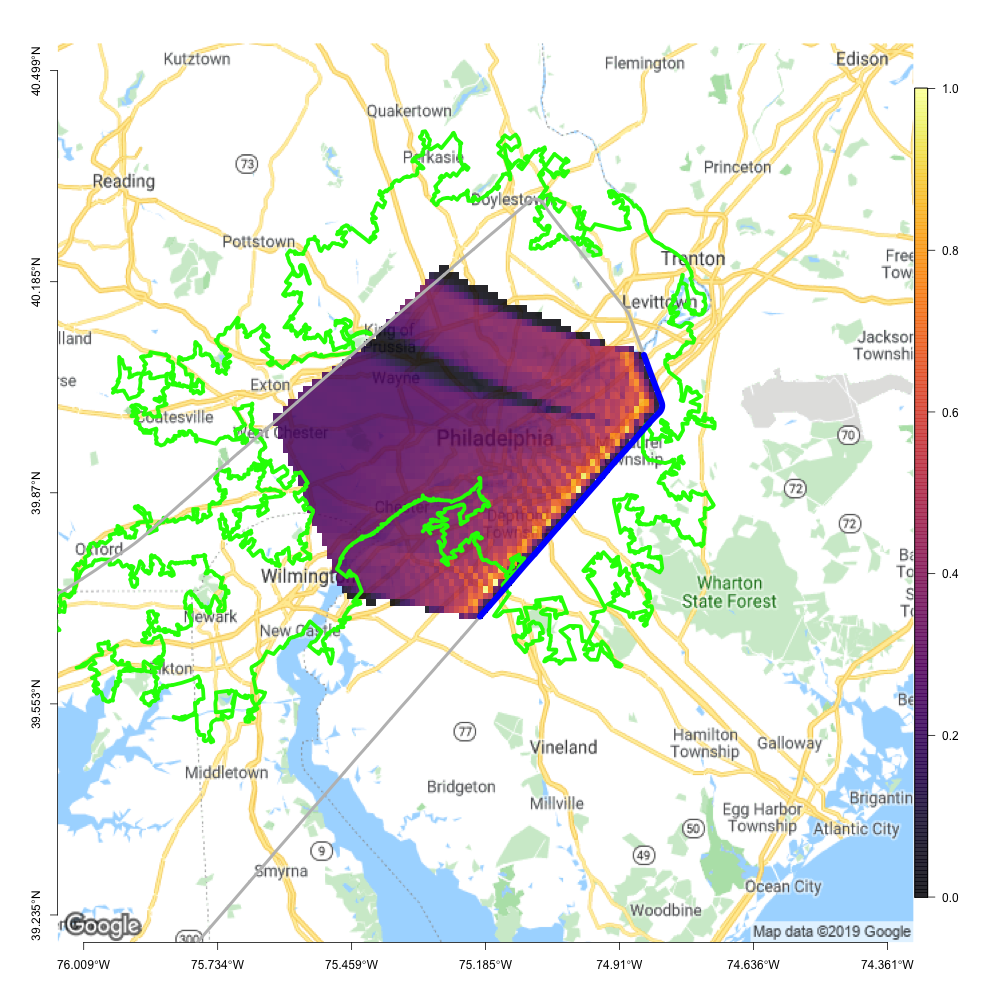


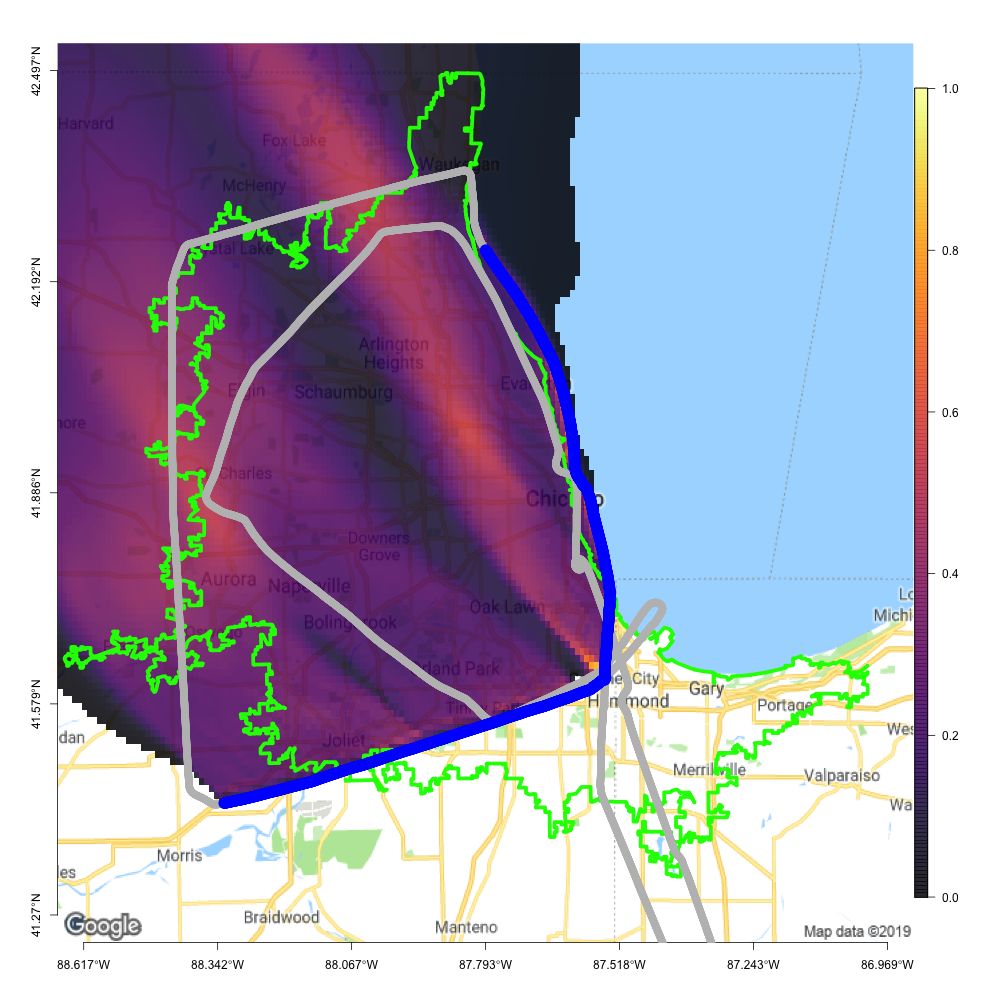


Flight Track

Downwind Transect

TIGER Domain

Normalized

Flux Sensitivity

Figure S16 **Flux Sensitivity Map for a Winter flight over Philadelphia, MA: 2018/04/26.** The x and y axis represent longitude and latitude respectively. The color bar indicates the normalized flux sensitivity of the flight track to the ground sources in the domain where lighter colors denote that the aircraft is more sensitive to emissions in those grid boxes. The total flight track is shown in gray and the selected transect is shown in blue. The US Census Bureau TIGER urbanized boundaries are plotted on green for reference.


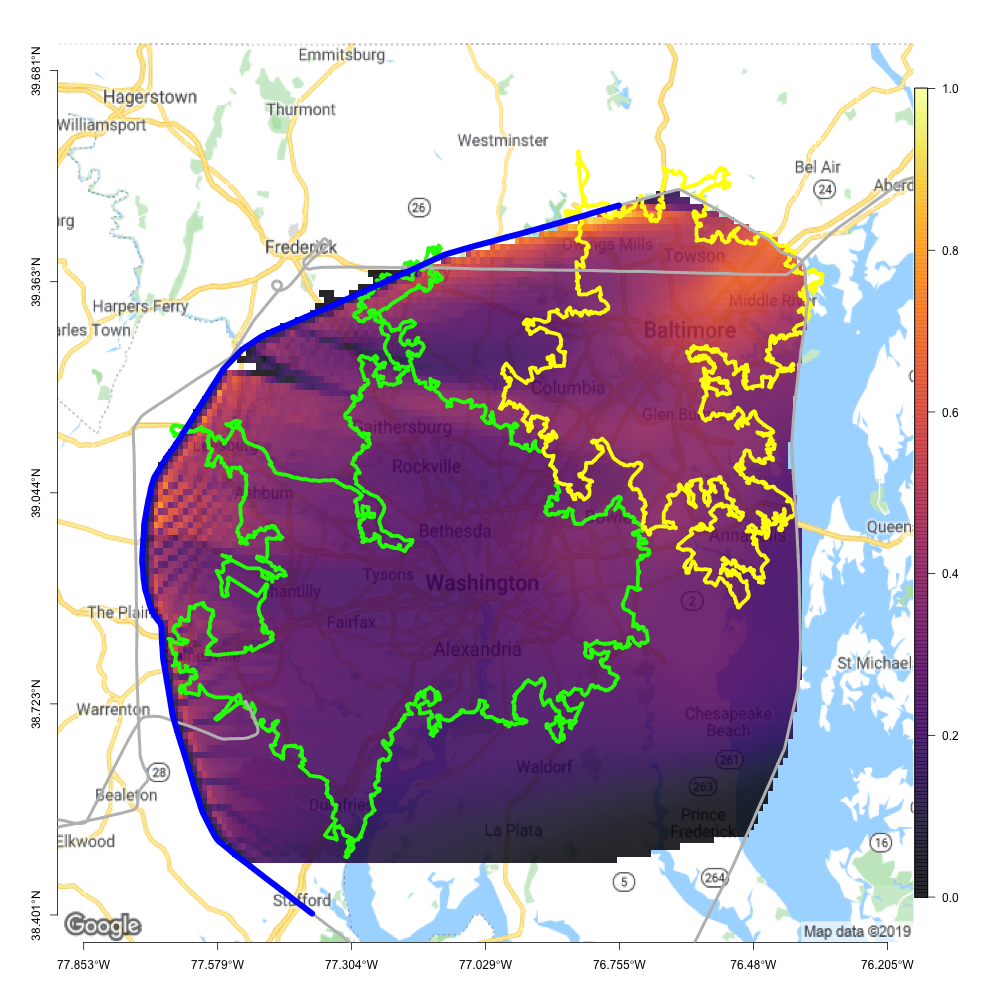


Figure S17 **Flux Sensitivity Map for a Summer flight over Washington, D.C. & Baltimore, MD: 2017/08/27.** The x and y axis represent longitude and latitude respectively. The color bar indicates the normalized flux sensitivity of the flight track to the ground sources in the domain where lighter colors denote that the aircraft is more sensitive to emissions in those grid boxes. The total flight track is shown in gray and the selected transect is shown in blue. The US Census Bureau TIGER urbanized boundaries are plotted on green for reference.


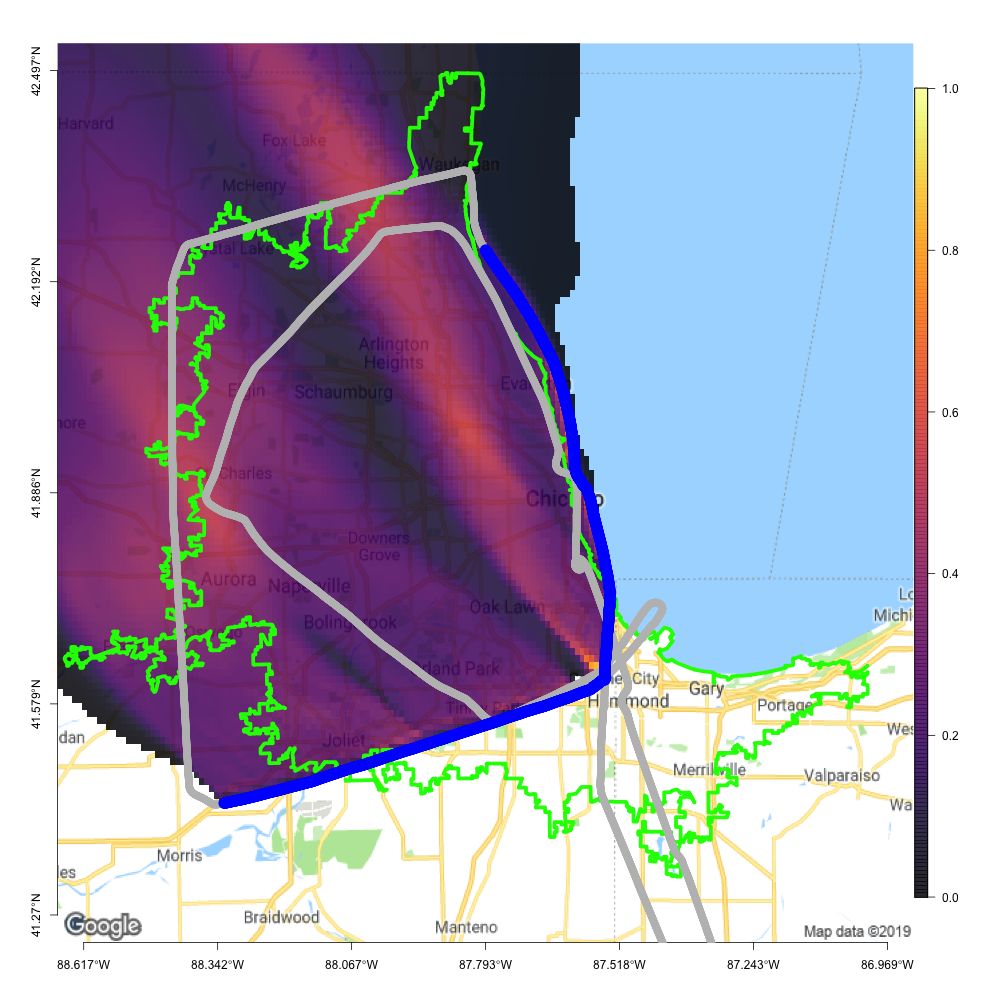


Flight Track

Downwind Transect

TIGER Domain

Normalized

Flux Sensitivity


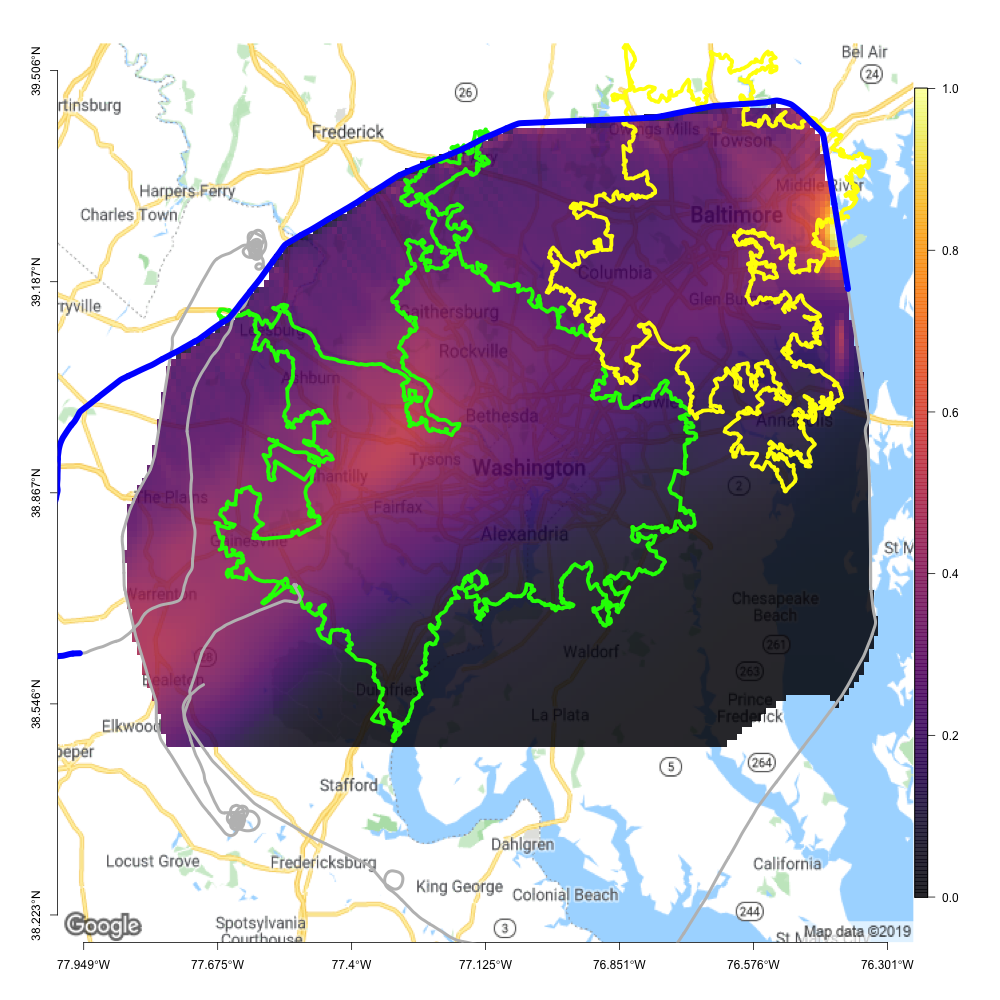


Figure S18 **Flux Sensitivity Map for a Winter flight over Washington, D.C. & Baltimore, MD: 2018/03/29.** The x and y axis represent longitude and latitude respectively. The color bar indicates the normalized flux sensitivity of the flight track to the ground sources in the domain where lighter colors denote that the aircraft is more sensitive to emissions in those grid boxes. The total flight track is shown in gray and the selected transect is shown in blue. The US Census Bureau TIGER urbanized boundaries are plotted on green for reference.


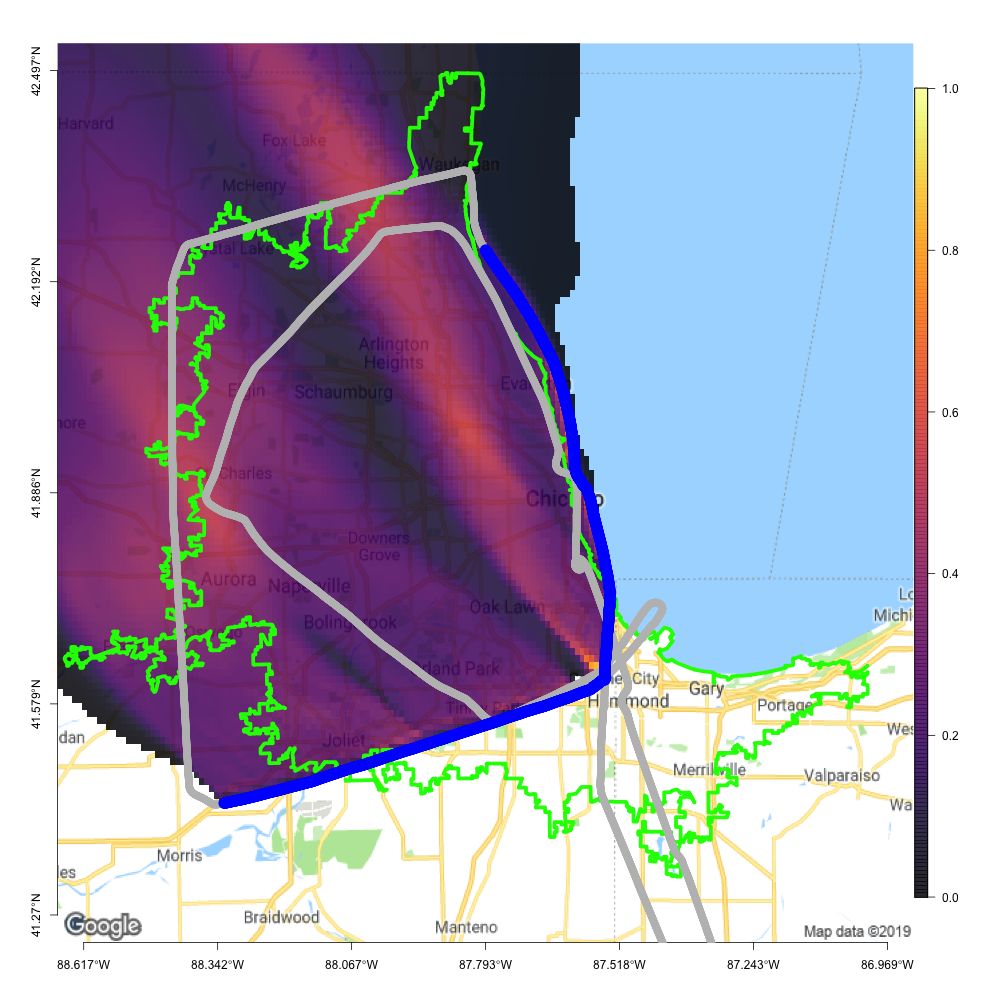


Flight Track

Downwind Transect

TIGER Domain

Normalized

Flux Sensitivity


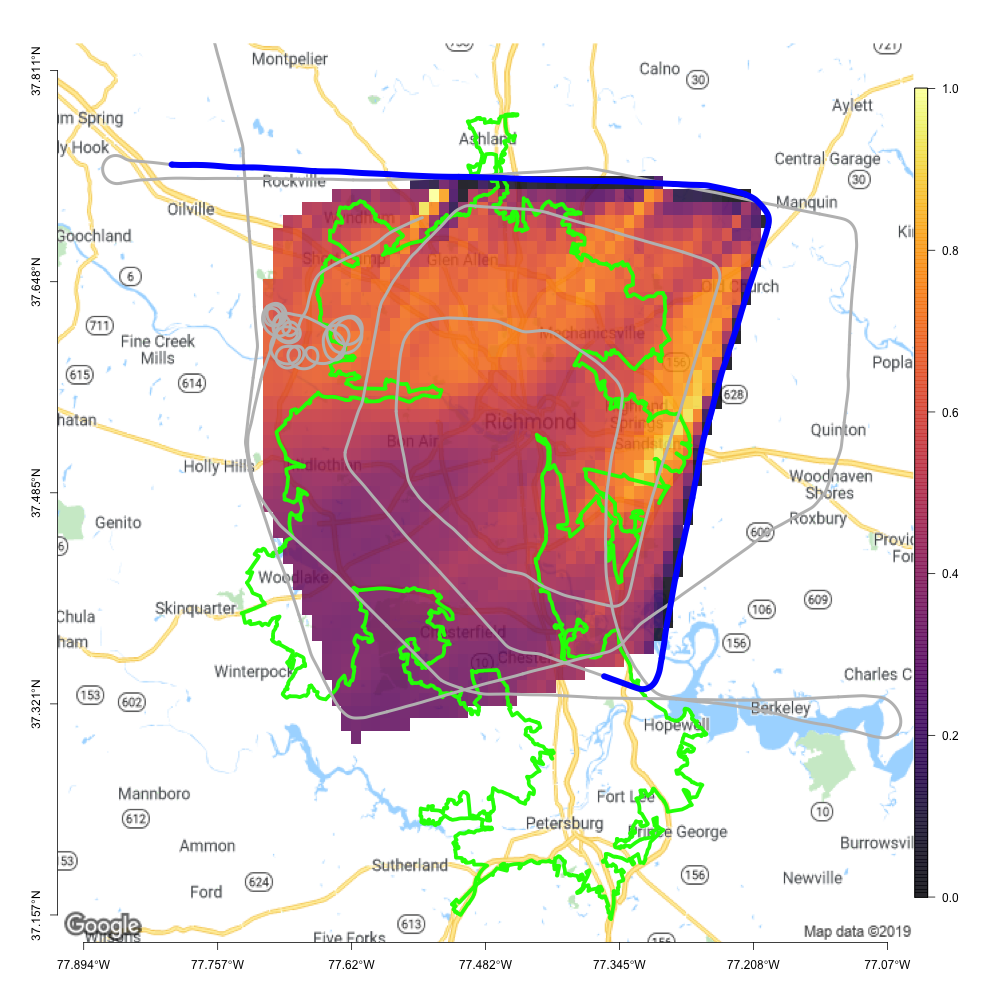


Figure S19 **Flux Sensitivity Map for a Winter flight over Richmond, VA: 2018/03/28.** The x and y axis represent longitude and latitude respectively. The color bar indicates the normalized flux sensitivity of the flight track to the ground sources in the domain where lighter colors denote that the aircraft is more sensitive to emissions in those grid boxes. The total flight track is shown in gray and the selected transect is shown in blue. The US Census Bureau TIGER urbanized boundaries are plotted on green for reference.


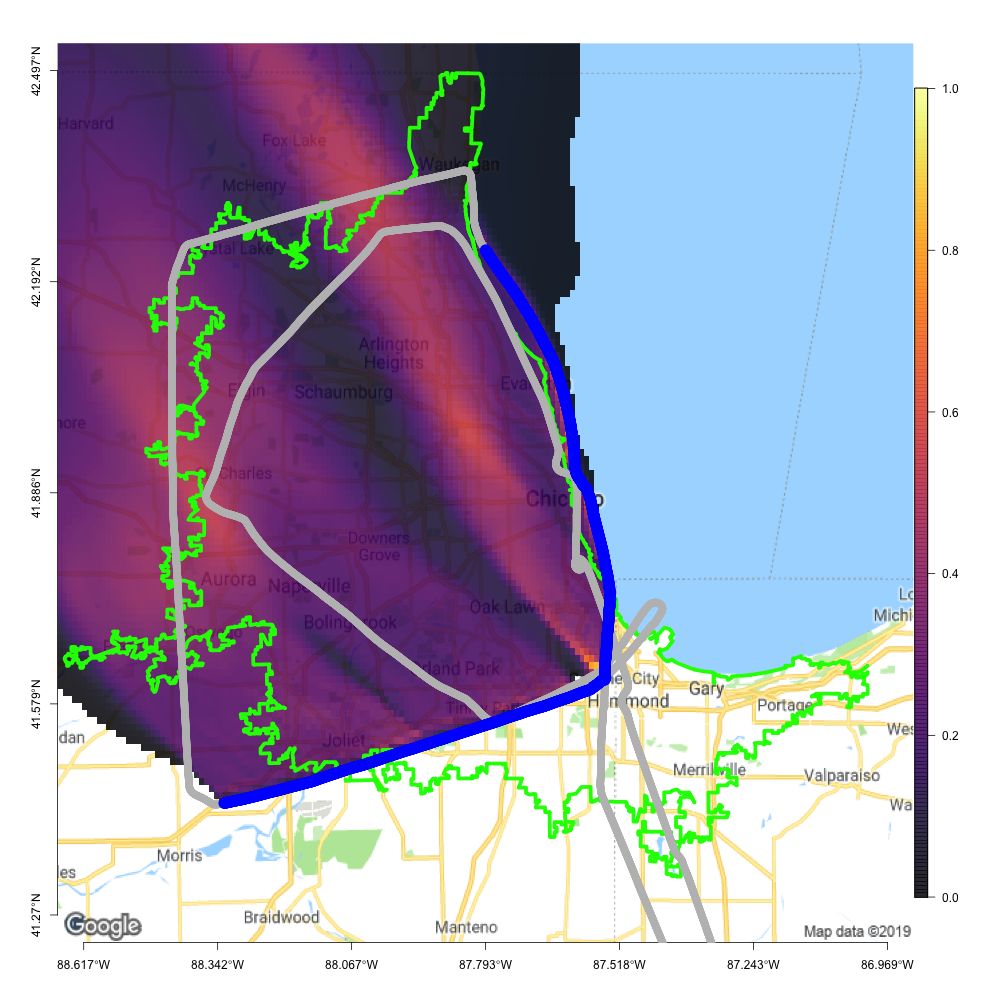


Flight Track

Downwind Transect

TIGER Domain

Normalized

Flux Sensitivity

**Supplemental Section 6: Flights in Indianapolis, IN with multiple transects:**

During 2017-06-19 flight over Indianapolis, IN the aircraft made 5 attempts at capturing the downwind transect. Of the 5 attempts, the aircraft sampled the complete plume (determined by visually identifying “background” on either side of the plume) two times. The flux sensitivity maps of the domain show that the two successful transects sampled very different parts of the domain. Flux sensitivity maps of transect 1 and transect 2 are shown below in Figures S20 and S21. In transect 2, the aircraft sampled only the urban core of Indianapolis. We would expect that this section of the city would contain a TMER that suggests a more natural gas dominate emission profile. We are able to calculate the TMER for transect two and we obtain 0.436 [0.416,0.455].

For transect 1 we obtained a plume that stretches much further north of the city and in fact samples the region containing the Noblesville landfill, a known source of relatively low biogenic CH4 emissions. For this transect we calculate a TMER of 26.4 [25.4, 27.69]. Based on the flux sensitivity maps for each transects we believe that the domain sampled by transect 1 (the more northern sample domain) is most comparable to the wintertime measurements.

For the flight over Indianapolis on 2018-03-16 three transects were flown over the same course. The MDI was computed for each transect and TMER distributions were calculated taking into account the meteorological uncertainty and the uncertainty in the EMER and the resulting distributions were then bootstrapped to obtain a 95% confidence interval of the mean TMER obtained from the city. The individual distributions and the resulting bootstrapped mean of all transects from the 2018-03-16 flight were fit with a gaussian density kernel and are shown below in Figure S22.


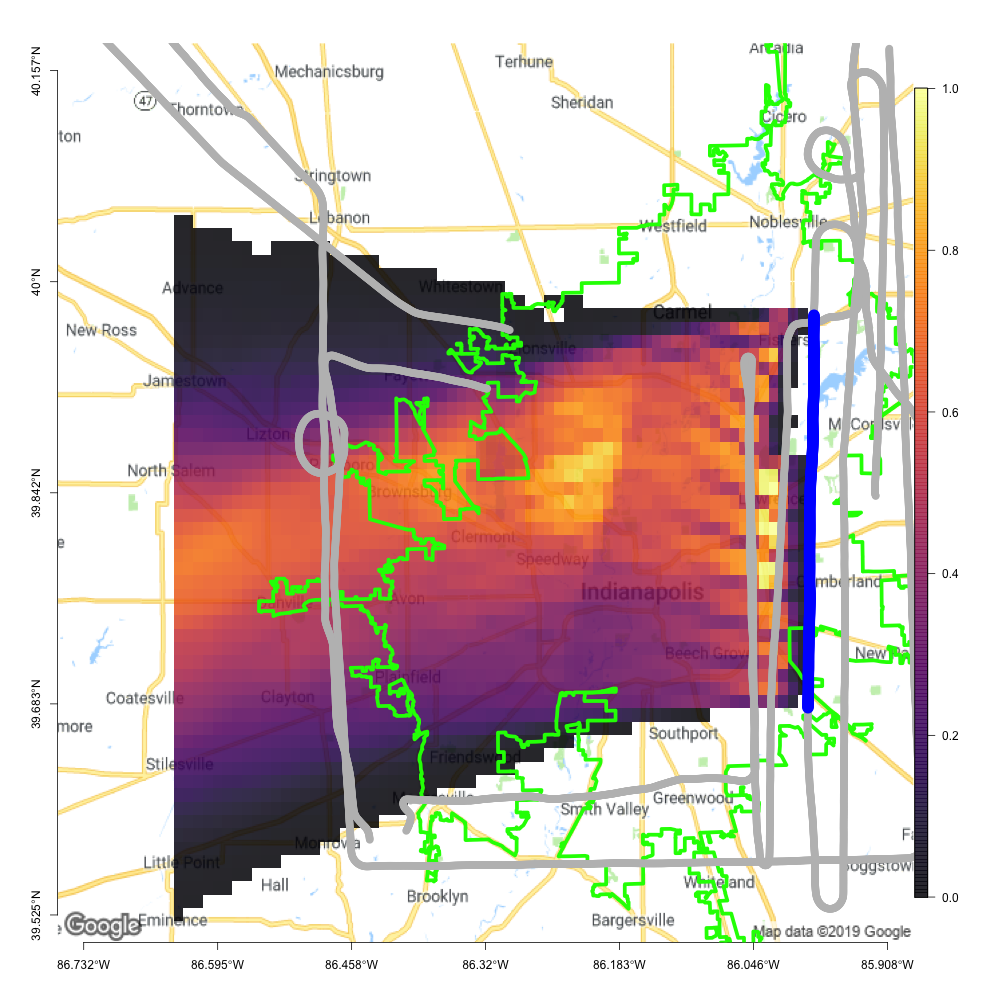


Figure S20 **Flux Sensitivity Map for a summer flight over Indianapolis, IN: 2017/06/19 (Transect2)**. Of the two complete transects sampling the city this transect (Transect 2) observed a more urban domain that is least comparable to the wintertime transcript**.** The x and y axis represent longitude and latitude respectively. The color bar indicates the normalized flux sensitivity of the flight track to the ground sources in the domain where lighter colors denote that the aircraft is more sensitive to emissions in those grid boxes. The total flight track is shown in gray and the selected transect is shown in blue. The US Census Bureau TIGER urbanized boundaries are plotted on green for reference.


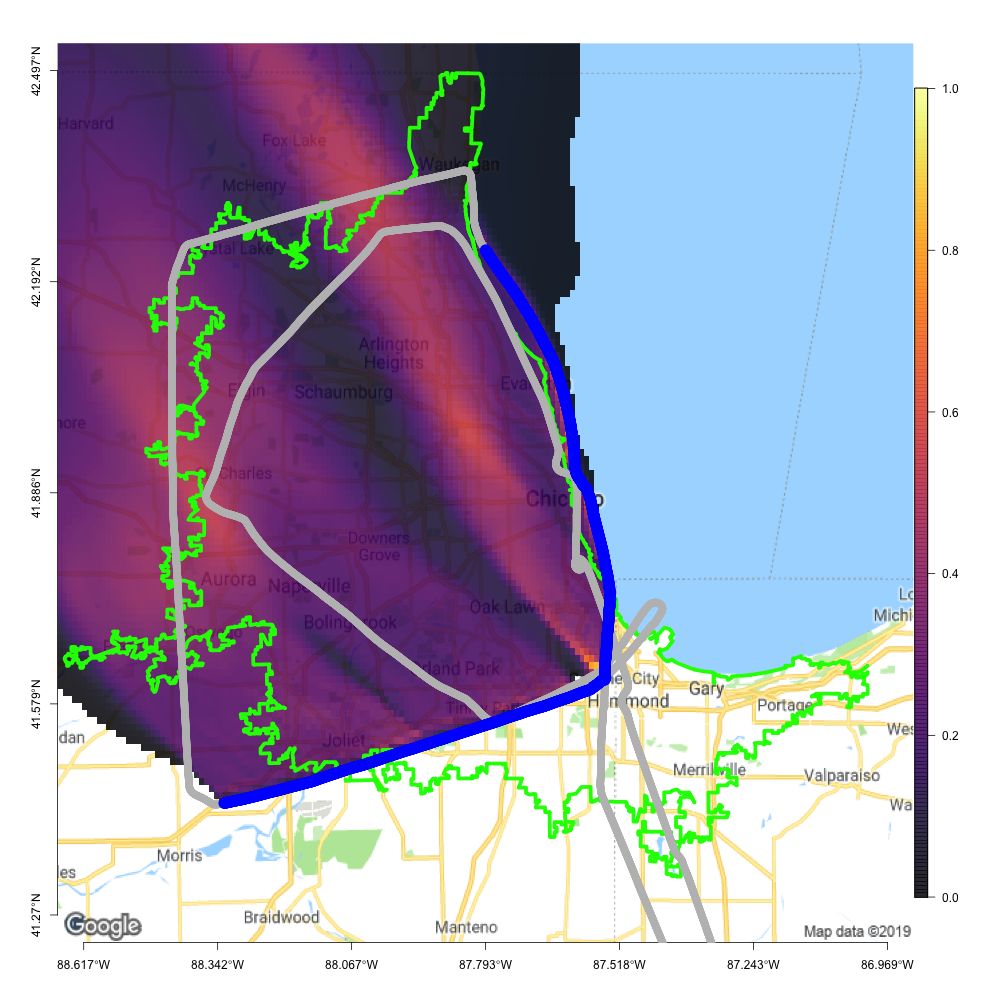


Flight Track

Downwind Transect

TIGER Domain

Normalized

Flux Sensitivity


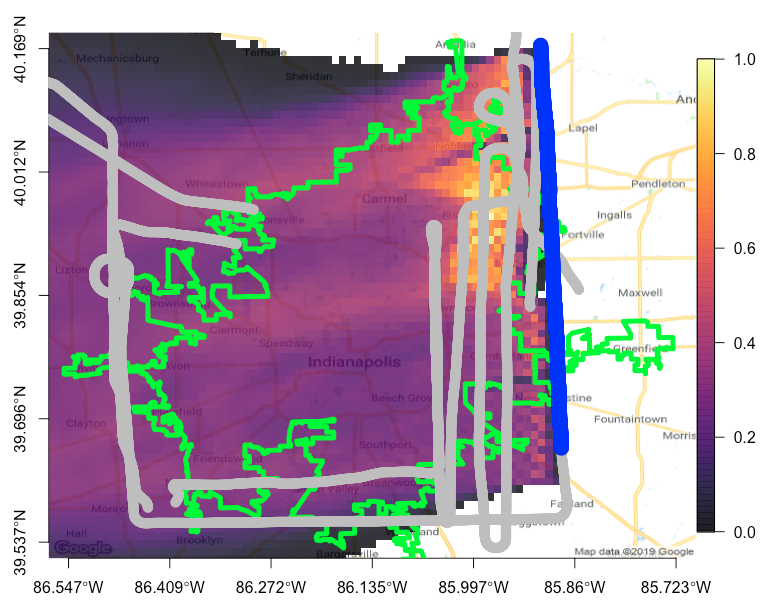


Figure S21 **Flux Sensitivity Map for a summer flight over Indianapolis, IN: 2017/06/19**. Of the two complete transects sampling the city this transect (**Transect 1**) observed a more rural domain that is most comparable to the wintertime transcript. This transect is used to compute the TMER that is reported in the manuscript**.** The x and y axis represent longitude and latitude respectively. The color bar indicates the normalized flux sensitivity of the flight track to the ground sources in the domain where lighter colors denote that the aircraft is more sensitive to emissions in those grid boxes. The total flight track is shown in gray and the selected transect is shown in blue. The US Census Bureau TIGER urbanized boundaries are plotted on green for reference.


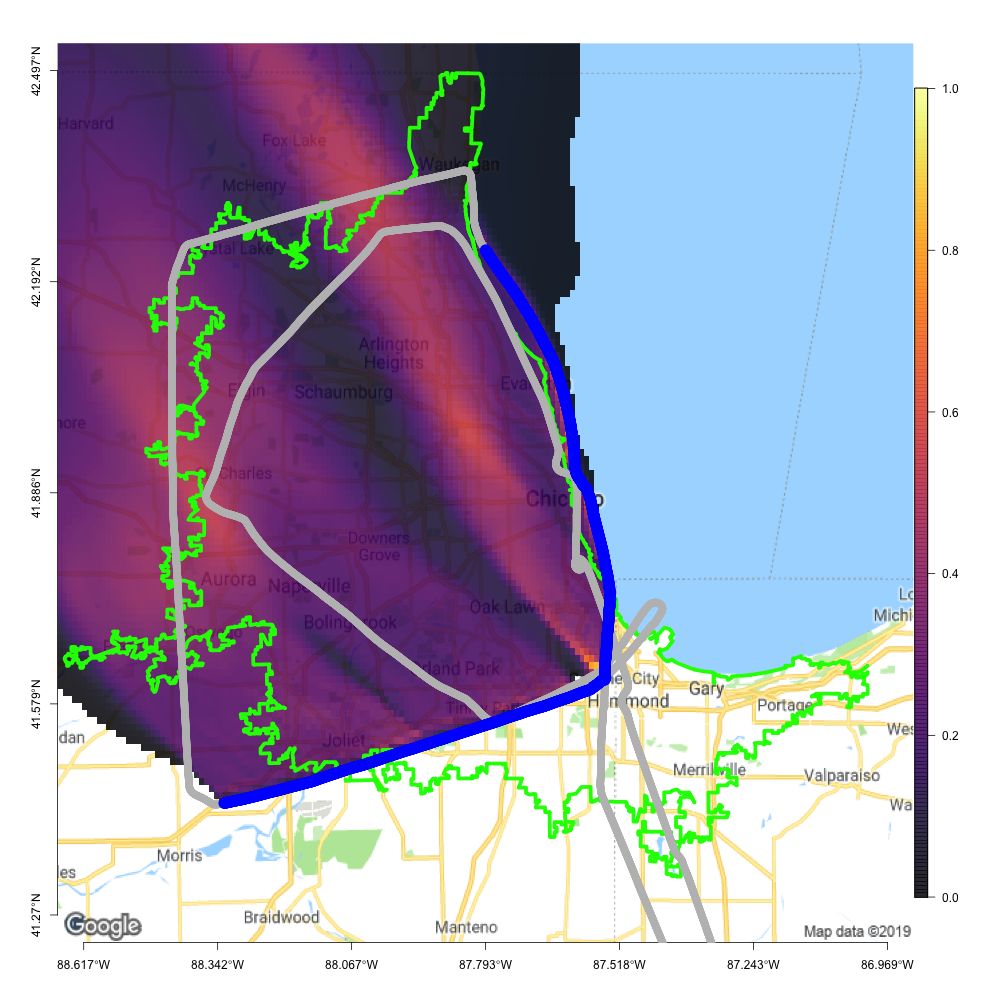


Flight Track

Downwind Transect

TIGER Domain

Normalized

Flux Sensitivity


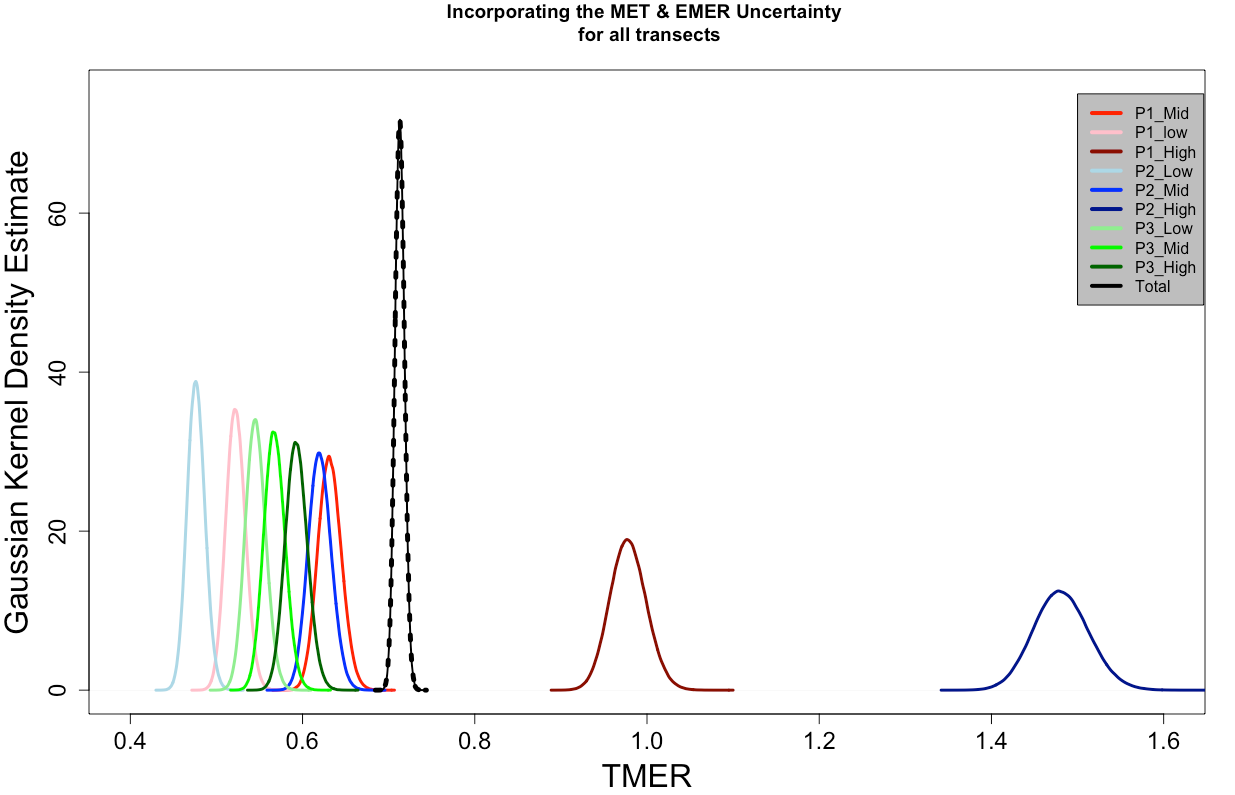


Figure S22 **Distributions of the TMER measured in Indianapolis on 2018-03-16.** The distributions designated by low, mid, and high represent those TMERs obtained when accounting for the meteorological uncertainty for each plume (P_1,P_2, or P_3). The black dashed line is the resulting distribution of the mean obtained by bootstrapping the sample distributions. Each distribution was then fit with a gaussian density kernel using the density() function in the “stats” package in R. The density kernels are the probability density functions shown above. The bootstrapped pdf result of all error distributions is what is reported in the manuscript.

**Supplemental Section 6: Gridded EPA Inventory Analysis:**

As discussed in the manuscript the GEPA inventory is quite comprehensive, including CH4 sources of both biogenic and thermogenic origin. Supplementary table 4 shows how we have classified those sources (biogenic or thermogenic) in our calculation of the inventory suggestion of the TMER. Of the 22 sectors we believe CH4 emissions from 12 of them would contain co-emitted C2H6 and have thus classified them as “thermogenic”. Supplementary table 4 also shows that emissions from the urban domains reported in this study are dominated by a select few sources. The data shown in ST4 is also shown as a bar plot in Figure S23 in order to highlight the relative contribution of each sector to the total emissions from each city in a way that better shows the distribution of sources. It is important to note that Figure S23 shows that landfill emission dominate inventory estimates of total CH4 flux from each of the urban areas.

Supplementary Table 4 **Few GEPA sectors are relevant for the CH4 emissions from each urban domain**. Superscript denotes that sector is responsible for less than 1 percent of total emissions in corresponding city. City superscript key: 1New York, NY, 2Boston, MA, 3Chicago, IL, 4Philadelphia, PA, 5Indianapolis, IN. 6Washington D.C & Baltimore, MD, 7Richmond, VA. This chart is meant to be read such that sectors with many superscripts are inconsequential to the total emissions in the urban domain as per GEPA.

Figure S23 **A graphical representation of the fractional emissions from each sector suggested by the GEPA inventory for the various urban areas sampled in this study.** In this comparison, GEPA was summed based on the US Census TIGER boundaries.

**Supplementary Section 7: GEPA Comparison to EDGAR:**

While GEPA is currently the most well regarded spatially resolved CH4 inventory for the United States, others do exist. In order compare these results not only to GEPA but also to other inventories we did a brief comparison of the GEPA inventory to the EDGAR version 4.3.2 inventory. We subdivided the EDGAR inventory and the GEPA inventory based on the TIGER boundaries and with same biogenic/thermogenic partitioning described for the GEPA inventory and found that for each urban domain in this study except Richmond, VA, EDGAR predicts a significantly more Biogenic fraction of the total CH4 from each urban area. While this is not unexpected as EDGAR is nominally population derived and would tends to place emissions in areas of greatest population density, it does have some impacts on our conclusions. EDGAR is an excellent example of how the importance of thermogenic emissions from natural gas is often underestimated for the urban distribution network with regards to total emissions and highlights the need for proper source apportionment of CH4 emissions within the urban area in order to inform local-level policy. The results from the multi-city inventory comparison are shown in Figure S24.

Figure S24 **Inventory comparisons of the suggested fraction of total CH4 emissions that can be attributed to natural gas sources for both the EDGAR 4.3.2 inventory and the GEPA inventory**. The Inventory was summed based on the US Census Bureau TIGER borders.

**Supplemental Section 8: Discussion of TMERs Reported with Added Uncertainty**:

Figure 1 in the main manuscript shows three flights for which results are presented with an “*” indicating that the uncertainty of these flights may be underestimated (New York, NY (2018-03-20), Philadelphia, PA (2018-04-26) and Indianapolis, IN (2017-06-19)). With respect to the 2018-04-26 flight and the 2017-06-19 flight, an MDI could not be computed due to insufficient sampling of the upwind portion of the domain. For both of these flights we approximated the background mole fractions by interpolating across the edges of the downwind enhancement and assumed that there were no dominant sources of CH4 or C2H6 upwind of the domain that were affecting the downwind measurement. Although this assumption is justifiable in a case where the incoming flow is from a direction where we can be confident there are no emissions (such as onshore flow as seen in coastal cities), there does exist the possibility for background bias in these two cases as we are unable to define a suitable upwind curtain with the aircraft flight track. After further analysis of these particular days, we believe that if unknown bias does exist, it is likely not significant enough to affect the conclusions in this study.

During our 2017-06-19 flight over Indianapolis, IN we sampled the city with a W wind. The upwind track of the flight was positioned such that it was just downwind of the Twin-Bridges landfill. Methane emissions from the landfill were observed as a high mixing ratio spike due to the fact that those emissions had not yet mixed homogeneously to the top of the PBL. Because of this, if we were to compute the MDI, we would carry through those high mixing ratio values observed in the upwind into the MDI and compute an artificially low mixing ratio enhancement from the city. Instead, the enhancement was computed by interpolating across the edges of the plume and subtracting those values from the downwind mixing ratio. This has been shown, by mass balance work done as a part of the INFLUX project, to be an effective method of computing the background for Indianapolis, IN as there are relatively few upwind sources that have a large effect on the mixing ratio enhancements in the region. (Cambaliza et al., 2015; Brian K. Lamb et al., 2016) Because this method has been demonstrated to work in this specific domain before, we believe that it did not dramatically affect the results presented in the manuscript.

During the 2018-04-26 Philadelphia, PA flight, flown as a part of the NOAA East Coast Outflow (ECO) campaign, the aircraft flew a partial background but did a vertical profile in the upwind portion of the flight transect. Based on the flux sensitivity maps and the positioning of the vertical profile, it was determined that the upwind did not sufficiently capture the inflow of the air into the city domain. On this day the NOAA Twin Otter was measuring a fetch of WNW air being blown across the city. Given that the domain WNW of Philadelphia is relatively rural (compared to a NE or SW wind which would have brought in emissions from NYC or DC/Baltimore) and values before and after the plume were quite similar, it was determined unlikely that there was a large source upwind of the city contributing to the enhancement of observed in the downwind plume. As such, this analysis was included in the study.

Figure S25 **The third transect during the 2018-03-20 NYC flight.** This transect was used for the analysis as we believe it to have minimal influence from the free troposphere.

For the flight analyzing emissions from New York, NY on 2018-03-20, we report a TMER greater than 1 (1.14 [1.11, 1.18]). The aircraft measured New York, NY with a NW wind. The aircraft flew over the Hudson River in order to intercept the plume as it transited over Manhattan Island. It was a cool day which led to a depressed marine PBL over the city. The aircraft flew three transects up and down the river. During the first two transects, it appeared that air from above the PBL was being sampled intermittently by the aircraft. During the third transect, we believe that we did not go above the PBL in the downwind transect, this is supported by the incredibly high correlation coefficient between CH4 and C2H6 (adj. R^2 = 0.92) and a slope almost identical to the EMER of the reported gas (slope=0.023, EMER=0.021), as well as the consistent water vapor mixing ratio through the transect and across the different transects. Both of these observations are shown in Figure S25. Though we believe the aircraft was able to intercept the plume in the PBL, we cannot rule out entrainment from above the boundary layer in other parts of the domain. Thus, we have reported the TMER calculated from this flight with the potential for additional uncertainty.

**Supplemental Section 9: Mixing ratio comparison to reported EMER:**

Figure S26 and S26b show a comparison of downwind mixing ratios subset from each flight to the ratio of C2H6:CH4 reported by the transmission companies. In order to position the reported slope on the plots for best visual comparison of the downwind mixing ratios, a y-intercept was computed such that the absolute value of the sum of the residuals was minimized. In almost every case, the maximum slope of the tracer-tracer plots corresponds well to the reported slope from the transmission companies. Because of the varying background values across the city and the incomplete mixing of biogenic and thermogenic emissions within the timeseries, a quantitative slope comparison of the EMER and the tracer-tracer plots does not represent well the extent of the agreement.

Figure S26a **Mixing ratio data from each flight with an intercept adjusted pipeline ratio to show the agreement of aircraft observed CH4:C2H6 with the published EMER.**

**Supplemental Section 10: TMER Calculation by Tracer-Tracer Regression (Slope Method)**

Figure S26b **Mixing ratio data from each flight with an intercept adjusted pipeline ratio to show the agreement of aircraft observed CH4:C2H6 with the published EMER.**

With the following analysis, we had hoped to compare the TMER calculated by Equation one in the manuscript to the slope method used in some other studies. (B.K. Lamb et al., 2016; McKain et al., 2015; Plant et al., 2019). The basis of the slope method involves computing a slope from the downwind mixing ratios of CH4 and C2H6 an inferring the contribution of natural gas to that slope given a good understanding of the EMER. We compute the Slope Inferred-TMER (SI-TMER) by means of quantile regression, where SI-TMER equals the slope of 50th quantile regression and the uncertainty is reported as the slope of the 2.5th and the 97.5th quantile regression. The quantile regressions are shown below for each flight. In the regression plots the slopes of each quantile regression from 2.5 to 97.5 are plotted in grey and the 50th quantile regression is shown in blue. In order to compare these results to a more common ordinary least squares analysis we also show the slopes of the OLS fit on the below plots in green. The red line is the EMER used for each flight as shown in Supplemental Section S9 (Figure S26 a & b).

In our slope analysis, we found that this method is incredibly sensitive to “plume” structures in the greater downwind enhancement. Plumes are a result of the signal from a city not homogeneously mixing to the required degree for this method to work. Previous studies have used R^2 correlation cut-offs to determine whether or not this was an issue, e.g., if the plume were totally mixed the R^2 would be 1. When attempting to duplicate this we found that, even if we used the exclusion criteria applied in other studies (R^2 = .31 (Plant et al., 2019)), we were still seeing the slope was influenced by large mixing ratio enhancements instead of large fluxes. This phenomena is especially noticeable in the cases like Indianapolis, IN where a landfill contributes to roughly 50% of the total flux from the city. (B.K. Lamb et al., 2016). Because the plume from Indianapolis landfill is never totally homogeneously mixed with the cities emissions and the mixing ratio enhancements from the landfill are very large, the slope method was not able to attribute emissions to the cities natural gas system (roughly 40% of the total emissions (B.K. Lamb et al., 2016)). Figure S27 shows the comparison between the SI-TMER and the integral method described in the manuscript. We observe these biases in many of the cities where individual plumes are detectable on top of the larger citywide enhancement and Figures S28 and S28b show the slopes determined by the OLS fit and quantile regression plotted on top of the total flight mixing ratio.

Figure S27 **A bar chart showing the comparison between the TMER slope and the integral methods**. The Error bars in the integral method are computed using the quantile regression described above.

**
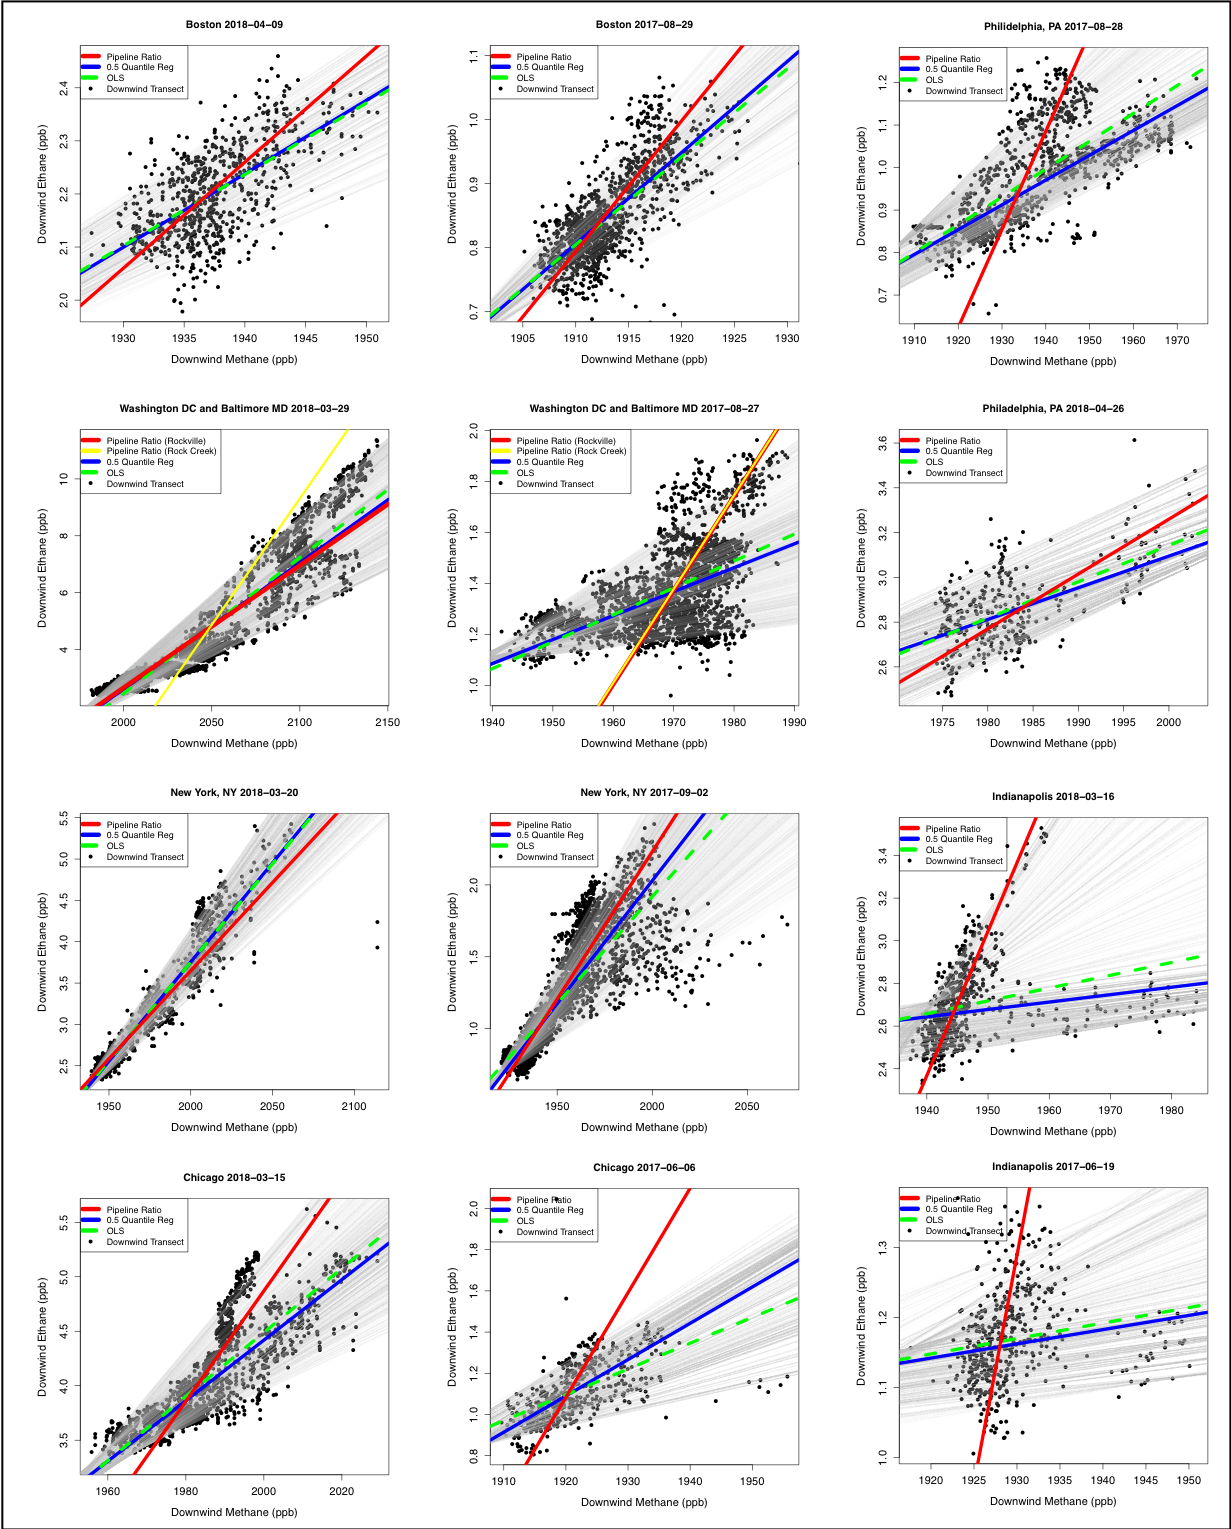
**

Figure S28a **Slope method results** showing quantile regressions from 2.5th to 97.5th quantile in grey with the 50th quantile regression highlighted in blue. The quantile regression slopes are compared to a standard Ordinary Least Squares regression (red).

**
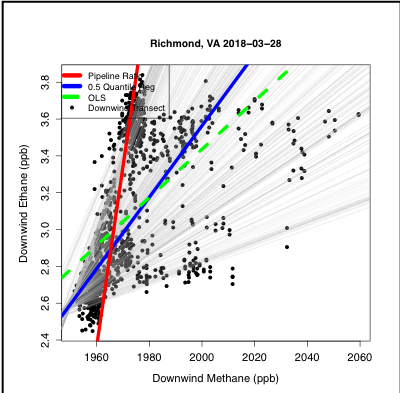
**

Figure S28b **Slope method results** showing quantile regressions from 2.5th to 97.5th quantile in grey with the 50th quantile regression highlighted in blue. The quantile regression slopes are compared to a standard Ordinary Least Squares regression (red).

Cambaliza, M.O.L., Shepson, P.B., Bogner, J., Caulton, D.R., Stirm, B., Sweeney, C., Montzka, S.A., Gurney, K.R., Spokas, K., Salmon, O.E., Lavoie, T.N., Hendricks, A., Mays, K., Turnbull, J., Miller, B.R., Lauvaux, T., Davis, K., Karion, A., Moser, B., Miller, C., Obermeyer, C., Whetstone, J., Prasad, K., Miles, N., Richardson, S., 2015. Quantification and source apportionment of the methane emission flux from the city of Indianapolis. Elem Sci Anth 3. https://doi.org/10.12952/journal.elementa.000037

Fasoli, B., Bowling, D.R., Mitchell, L., Mendoza, D., Lin, J.C., 2018. Simulating atmospheric tracer concentrations for spatially distributed receptors: updates to the Stochastic Time-Inverted Lagrangian Transport model’s R interface (STILT-R version 2). Geosci. Model Dev. 11, 2813–2824. https://doi.org/10.5194/gmd-11-2813-2018

Gerbig, C., Körner, S., Lin, J.C., 2008. Vertical mixing in atmospheric tracer transport models: Error characterization and propagation. Atmos. Chem. Phys. 8, 591–602. https://doi.org/10.5194/acp-8-591-2008

Gvakharia, A., Kort, E.A., Smith, M.L., Conley, S., 2018. Testing and evaluation of a new airborne system for continuous N2O, CO2, CO, and H2O measurements: The Frequent Calibration High-performance Airborne Observation System (FCHAOS). Atmos. Meas. Tech. 11, 6059–6074. https://doi.org/10.5194/amt-11-6059-2018

Hajny, K., Salmon, O.E., Rudek, J., Lyon, D.R., Stuff, A.A., Stirm, B.H., Kaeser, R., Floerchinger, C., Conley, S.A., Smith, M.L., others, 2019. Observations of Methane Emissions from Natural Gas-Fired Power Plants. Environ. Sci. Technol.

Lamb, B.K., Cambaliza, M.O.L., Davis, K.J., Edburg, S.L., Ferrara, T.W., Floerchinger, C., Heimburger, A.M.F., Herndon, S., Lauvaux, T., Lavoie, T., Lyon, D.R., Miles, N., Prasad, K.R., Richardson, S., Roscioli, J.R., Salmon, O.E., Shepson, P.B., Stirm, B.H., Whetstone, J., 2016. Direct and Indirect Measurements and Modeling of Methane Emissions in Indianapolis, Indiana. Environ. Sci. Technol. 50, 8910–8917. https://doi.org/10.1021/acs.est.6b01198

Lamb, B.K., Cambaliza, M.O.L., Davis, K.J., Edburg, S.L., Ferrara, T.W., Floerchinger, C., Heimburger, A.M.F., Herndon, S., Lauvaux, T., Lavoie, T., Lyon, D.R., Miles, N., Prasad, K.R., Richardson, S., Roscioli, J.R., Salmon, O.E., Shepson, P.B., Stirm, B.H., Whetstone, J., 2016. Direct and Indirect Measurements and Modeling of Methane Emissions in Indianapolis, Indiana. Environ. Sci. Technol. 50. https://doi.org/10.1021/acs.est.6b01198

Lin, J.C., Gerbig, C., 2005. Accounting for the effect of transport errors on tracer inversions. Geophys. Res. Lett. 32, 1–5. https://doi.org/10.1029/2004GL021127

McKain, K., Down, A., Raciti, S.M., Budney, J., Hutyra, L.R., Floerchinger, C., Herndon, S.C., Nehrkorn, T., Zahniser, M.S., Jackson, R.B., Phillips, N., Wofsy, S.C., 2015. Methane emissions from natural gas infrastructure and use in the urban region of Boston, Massachusetts. Proc. Natl. Acad. Sci. U. S. A. 112. https://doi.org/10.1073/pnas.1416261112

Plant, G., Kort, E., Floerchinger, C., Gvakharia, A., Vimont, I., Sweeney, C., 2019. Large fugitive methane emissions from urban centers along the US East Coast. Geophys. Res. Lett. https://doi.org/10.1029/2019GL082635

Santoni, G.W., Daube, B.C., Kort, E.A., Jiménez, R., Park, S., Pittman, J. V., Gottlieb, E., Xiang, B., Zahniser, M.S., Nelson, D.D., Mcmanus, J.B., Peischl, J., Ryerson, T.B., Holloway, S., Andrews, A.E., Sweeney, C., Hall, B., Hintsa, E.J., Moore, F.L., Elkins, J.W., Hurst, D.F., Stephens, B.B., Bent, J., Wofsy, S.C., 2014. Evaluation of the airborne quantum cascade laser spectrometer (QCLS) measurements of the carbon and greenhouse gas suite - CO2, CH4, N2O, and CO - during the CalNex and HIPPO Campaigns. Atmos. Meas. Tech. 7, 1509–1526. https://doi.org/10.5194/amt-7-1509-2014
